# Supplementary material
Source: PubMed Central journal article supplement (PMC5148702)

**Supplementary Information**

**For**

**Tetracyclic Indolines as A Novel Class of  $\beta$ -Lactam-Selective  
Resistance-Modifying Agent for MRSA**

Yugen Zhu<sup>a,‡</sup>, Lakota Cleaver<sup>a,‡</sup>, Wei Wang<sup>a</sup>, Jessica D. Podoll<sup>a</sup>, Shane Walls<sup>a</sup>, Austin Jolly<sup>a</sup>, Xiang Wang<sup>a\*</sup>

<sup>a</sup> Department of Chemistry and Biochemistry, University of Colorado, Boulder, CO  
80309, USA

E-mail: [xiang.wang@colorado.edu](mailto:xiang.wang@colorado.edu)

# NMR spectra of representative compounds:

## Compound 4

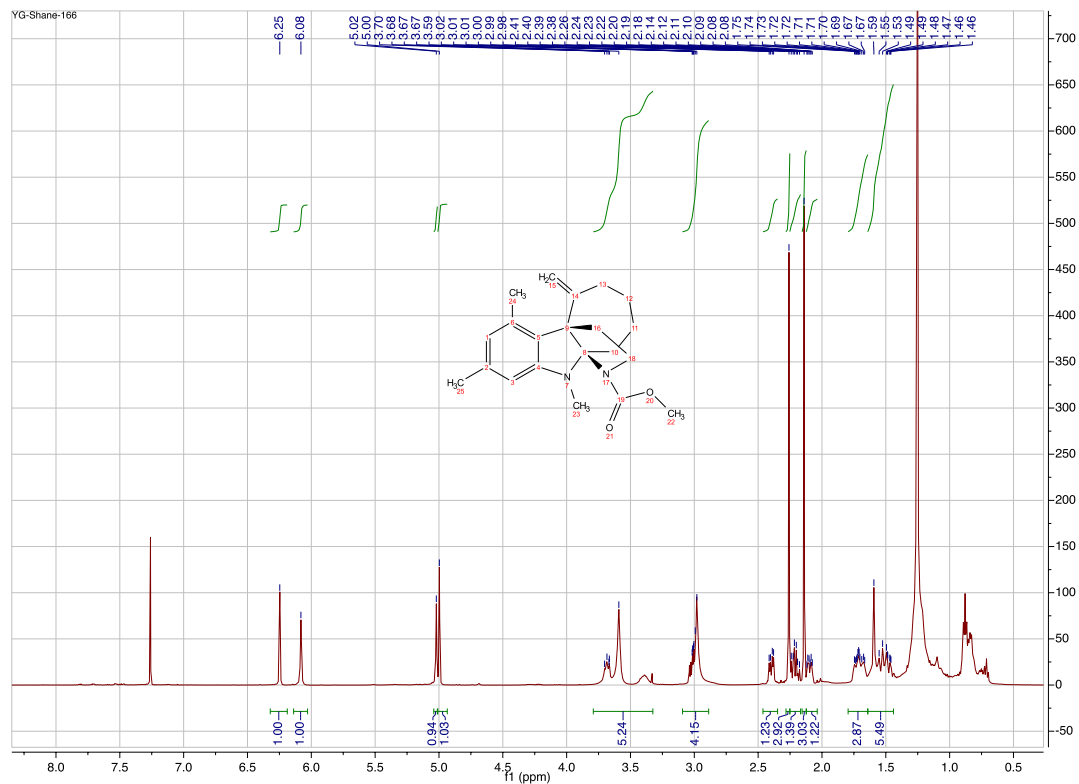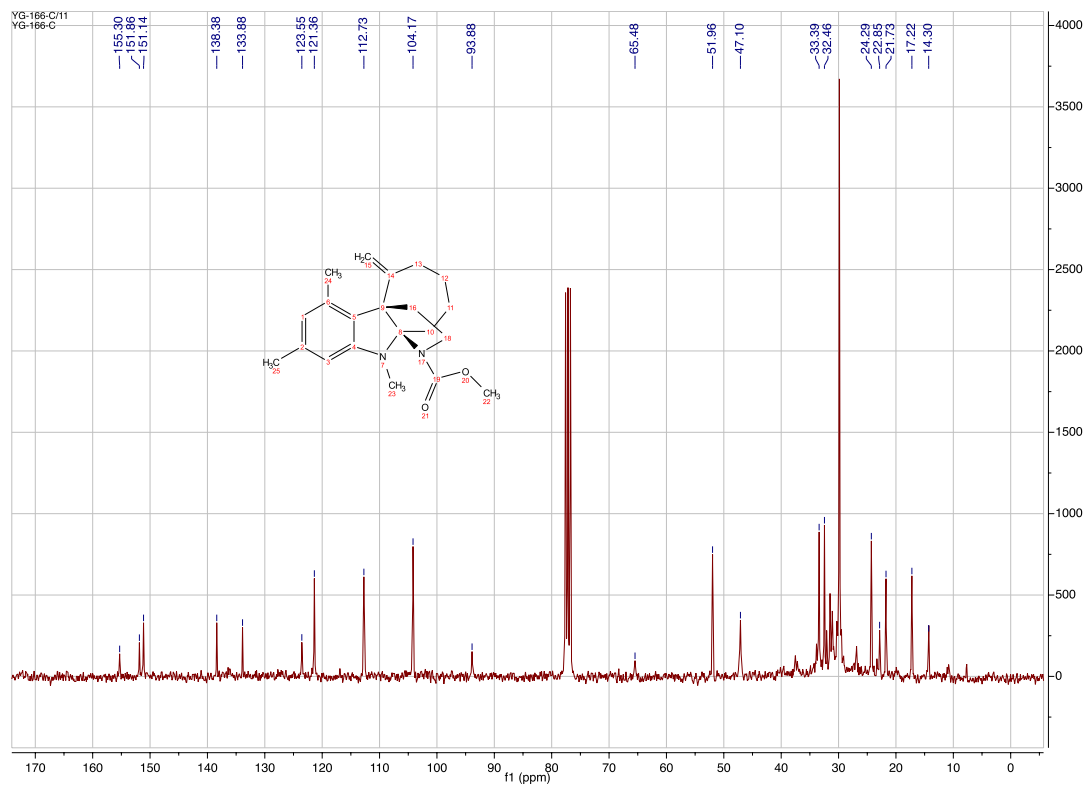

Compound 5

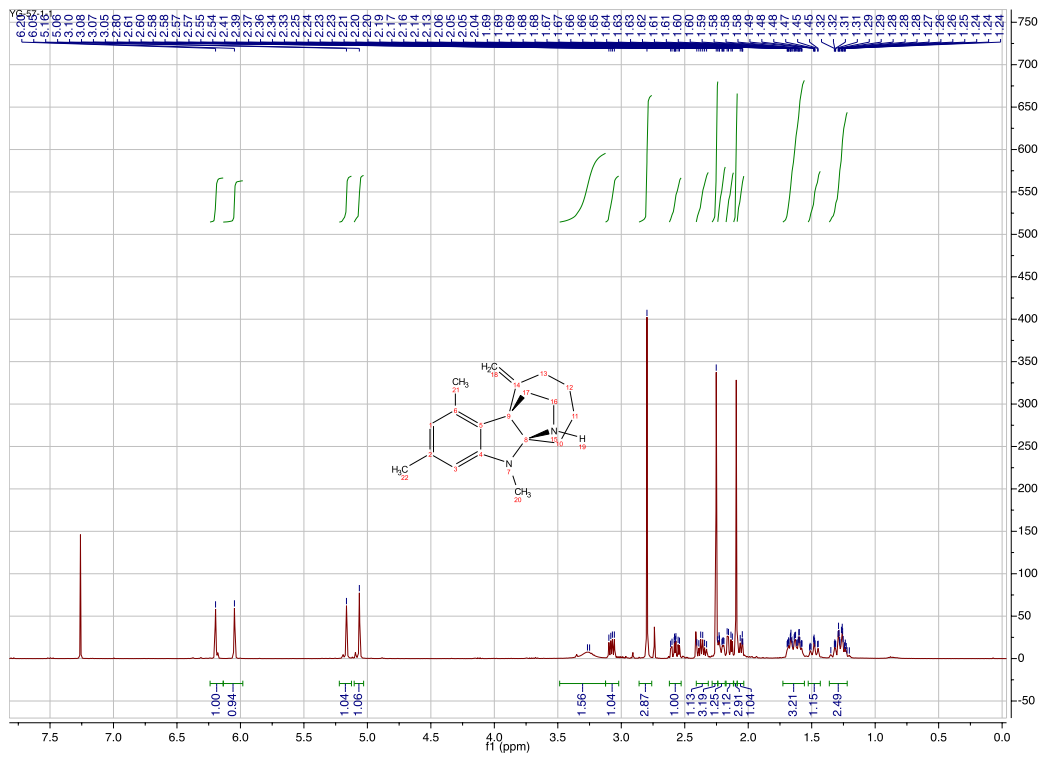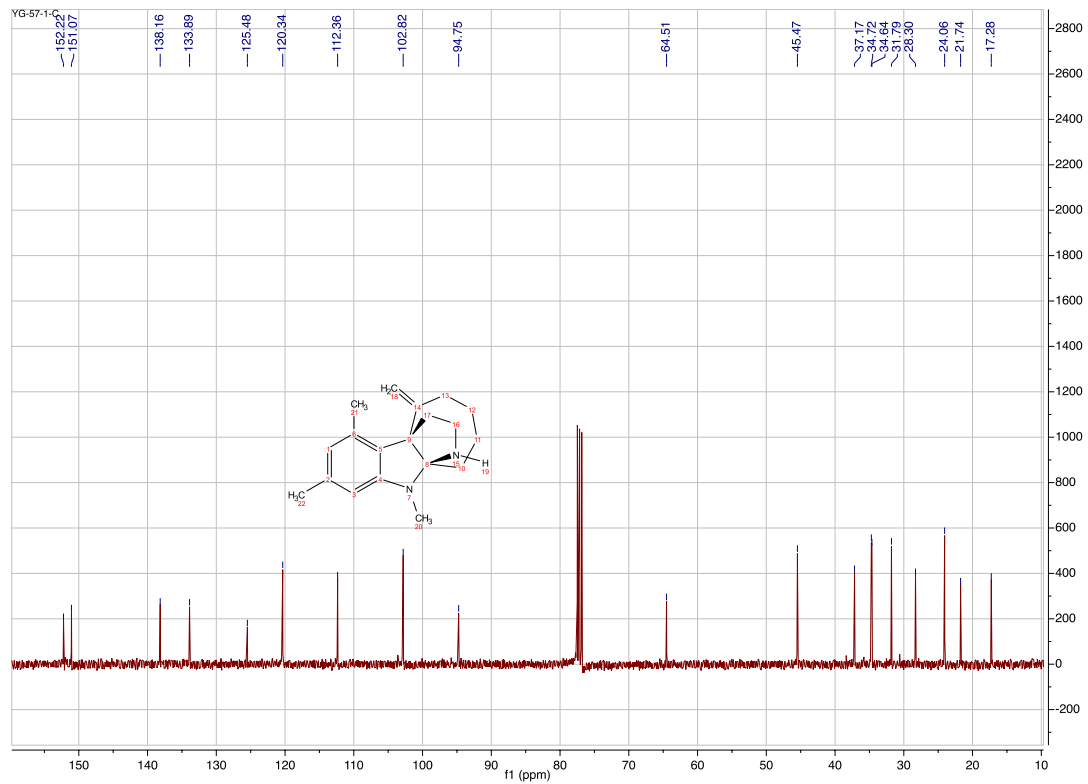

# Compound 6a

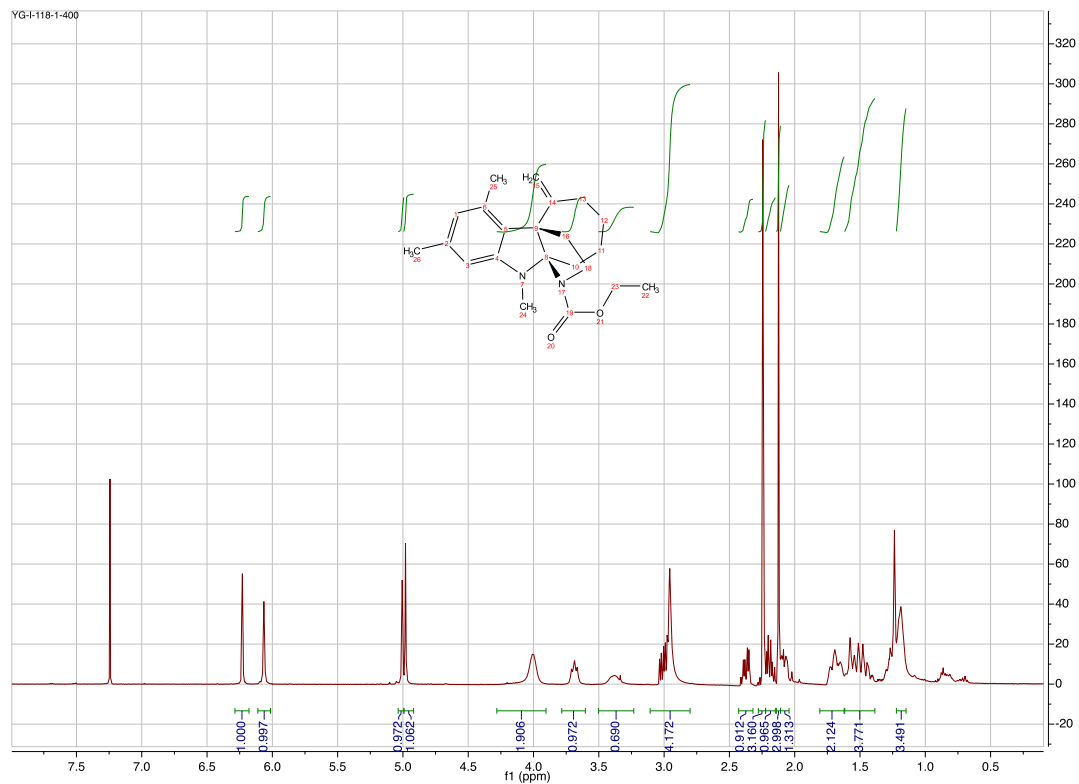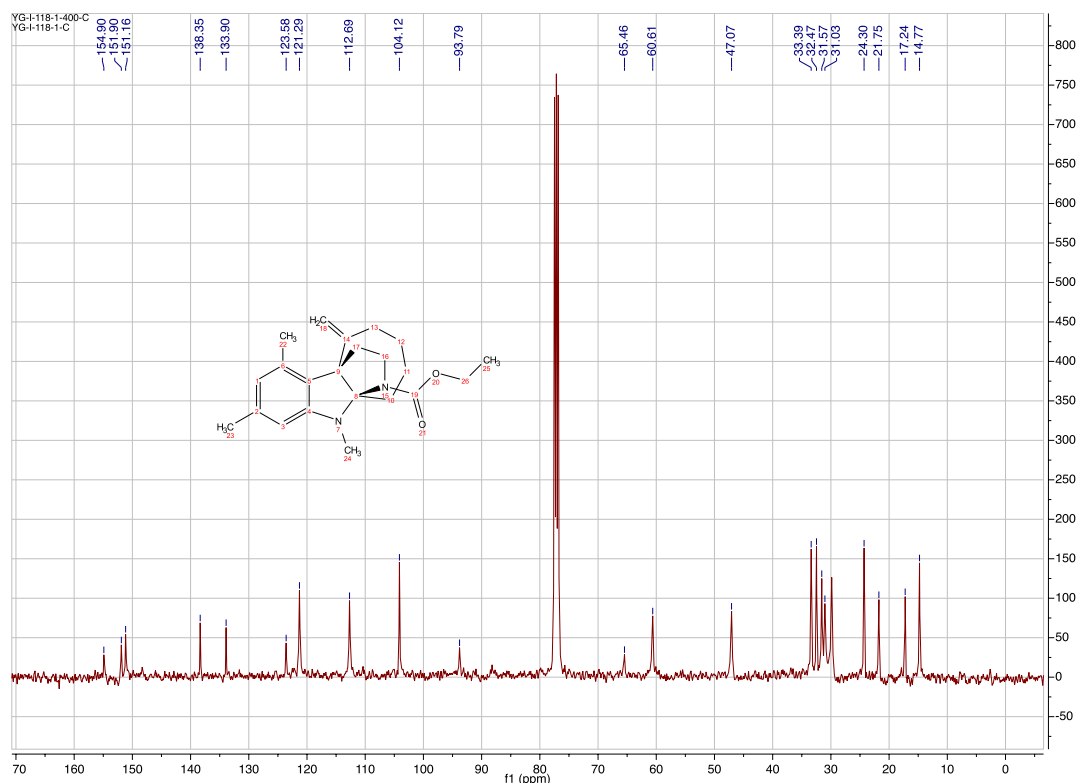

Compound 6b

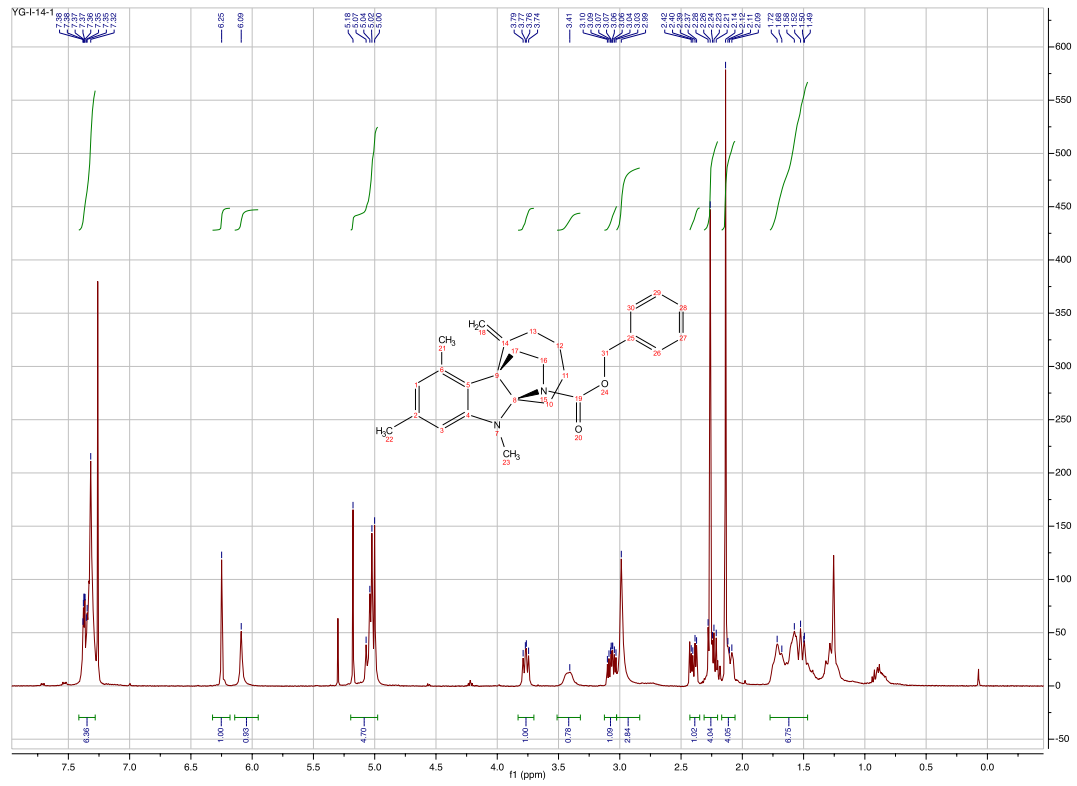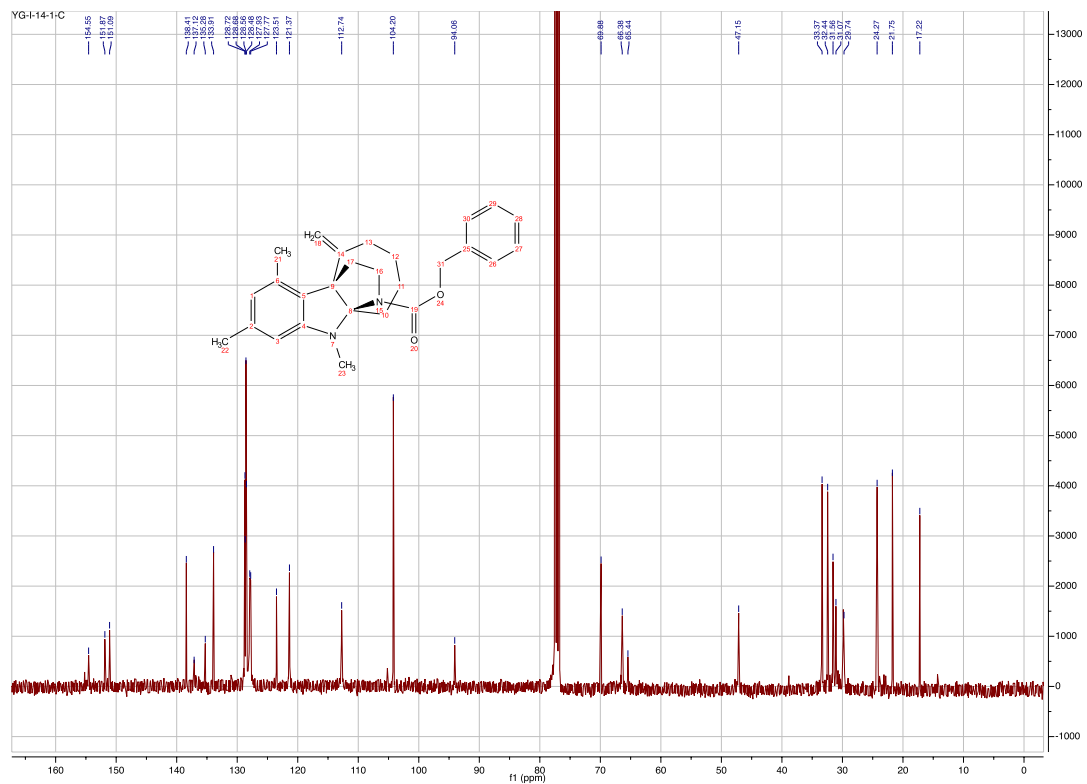

Compound 6c

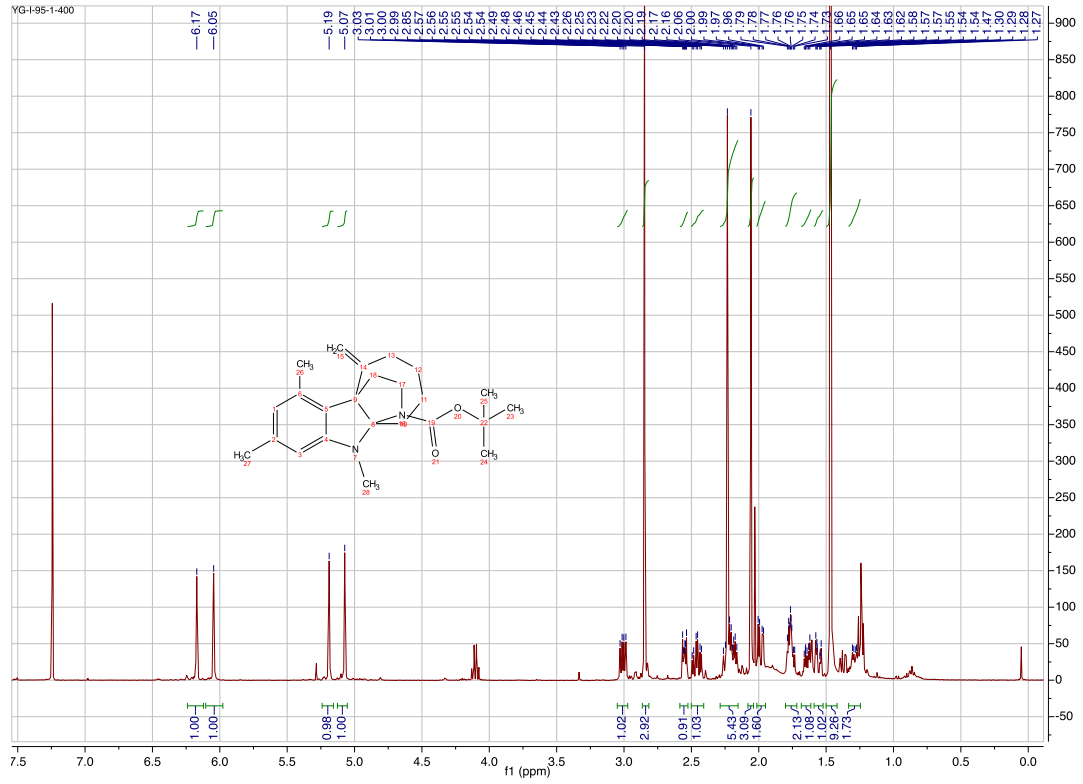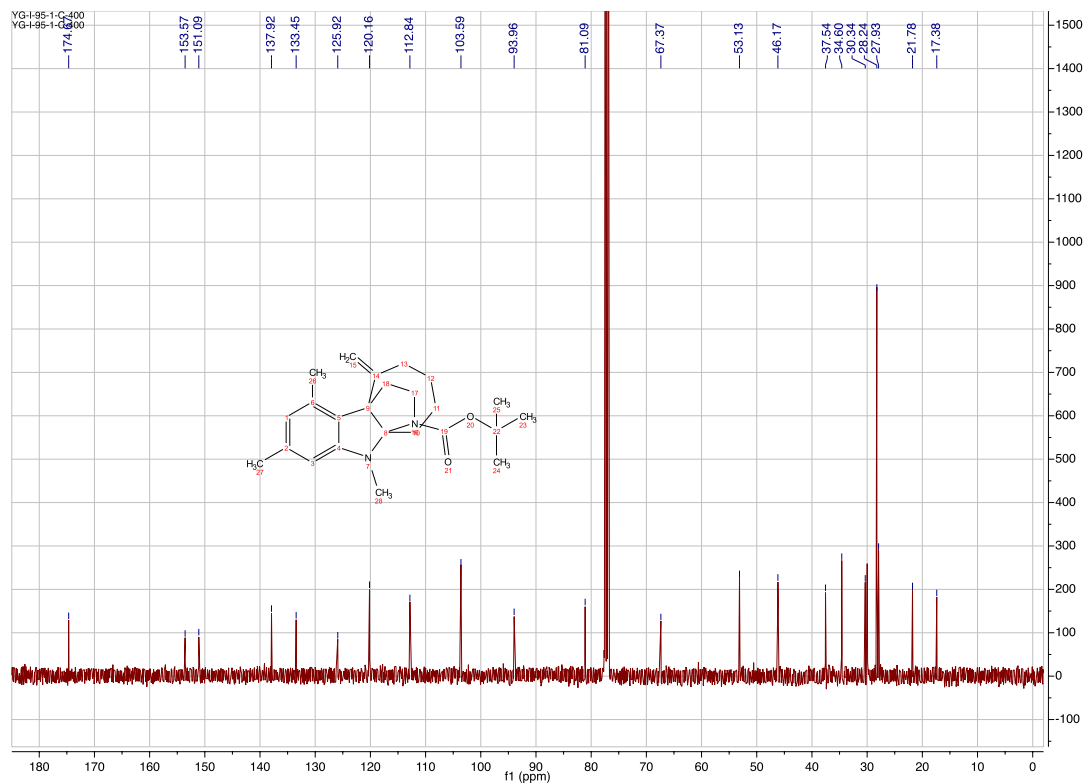

# Compound 6d

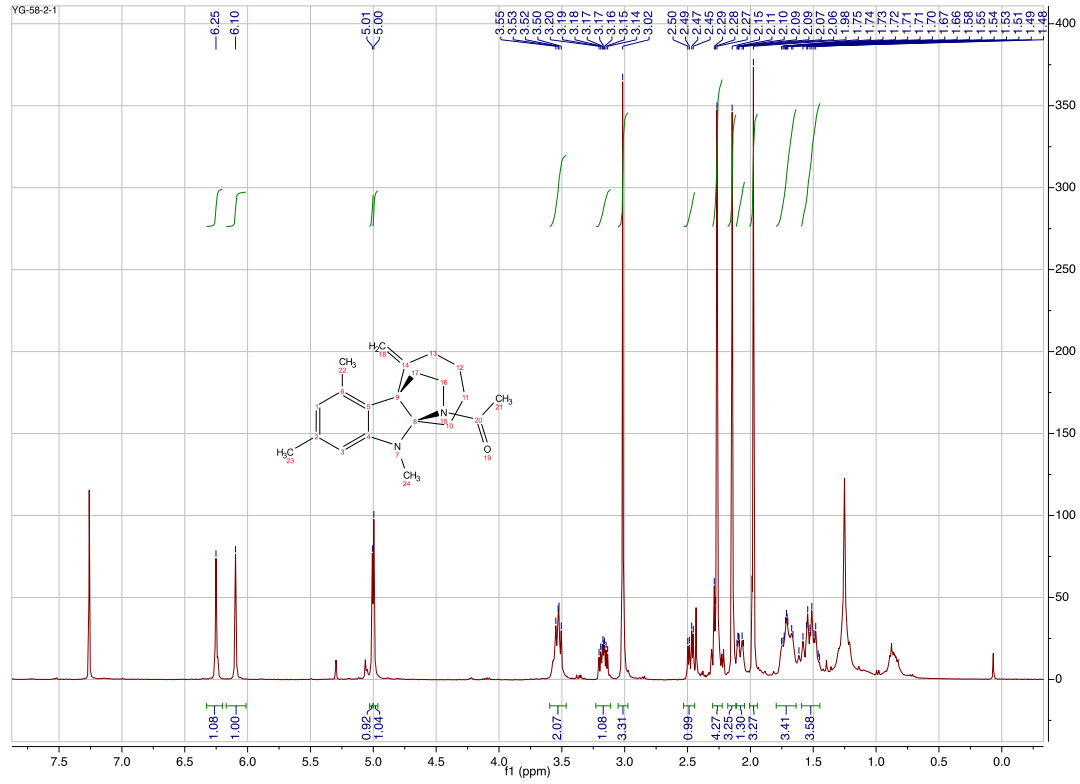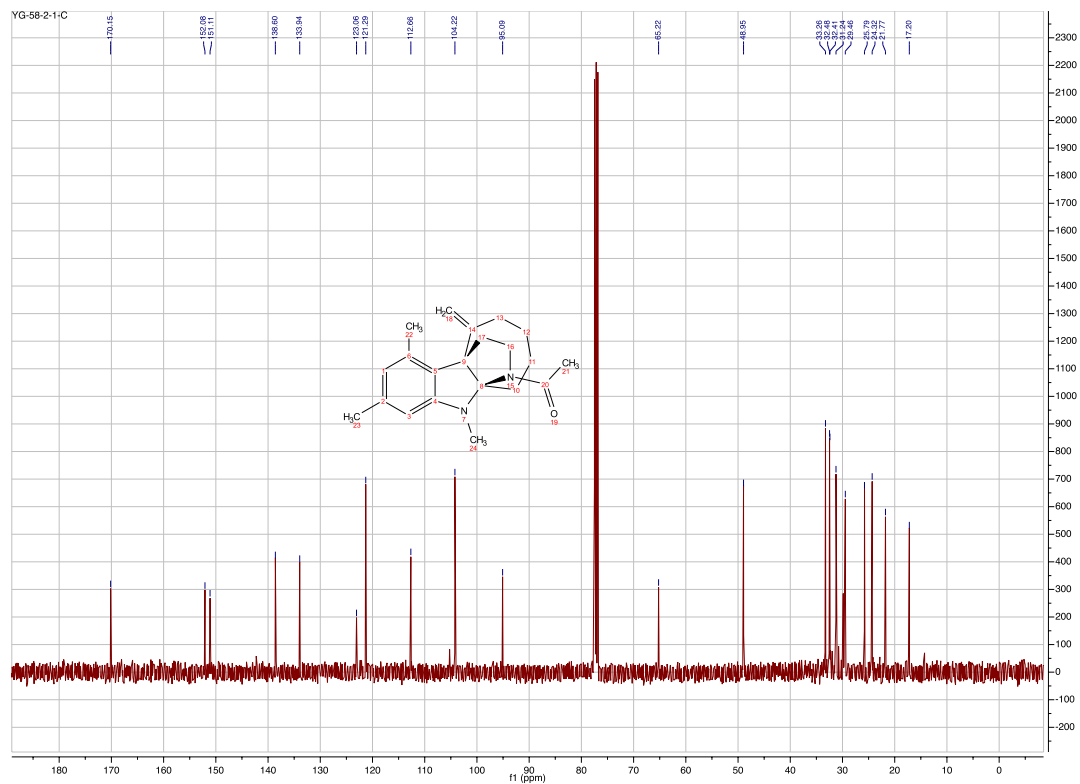

# Compound 6e

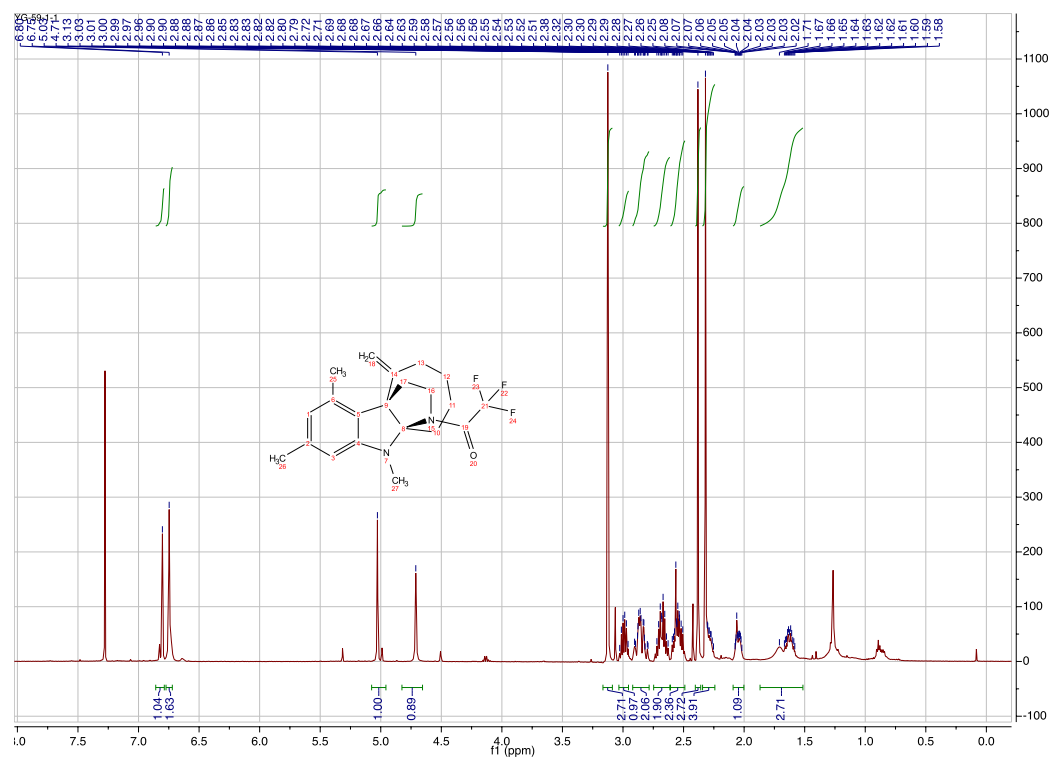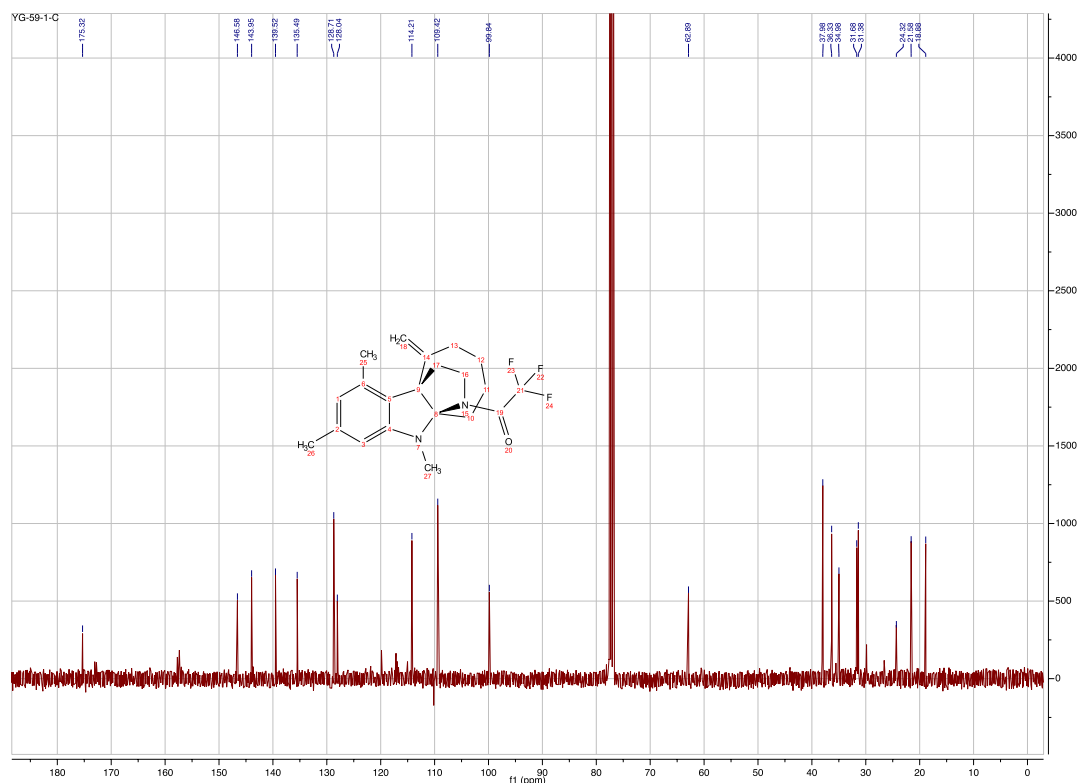



# Compound 6f

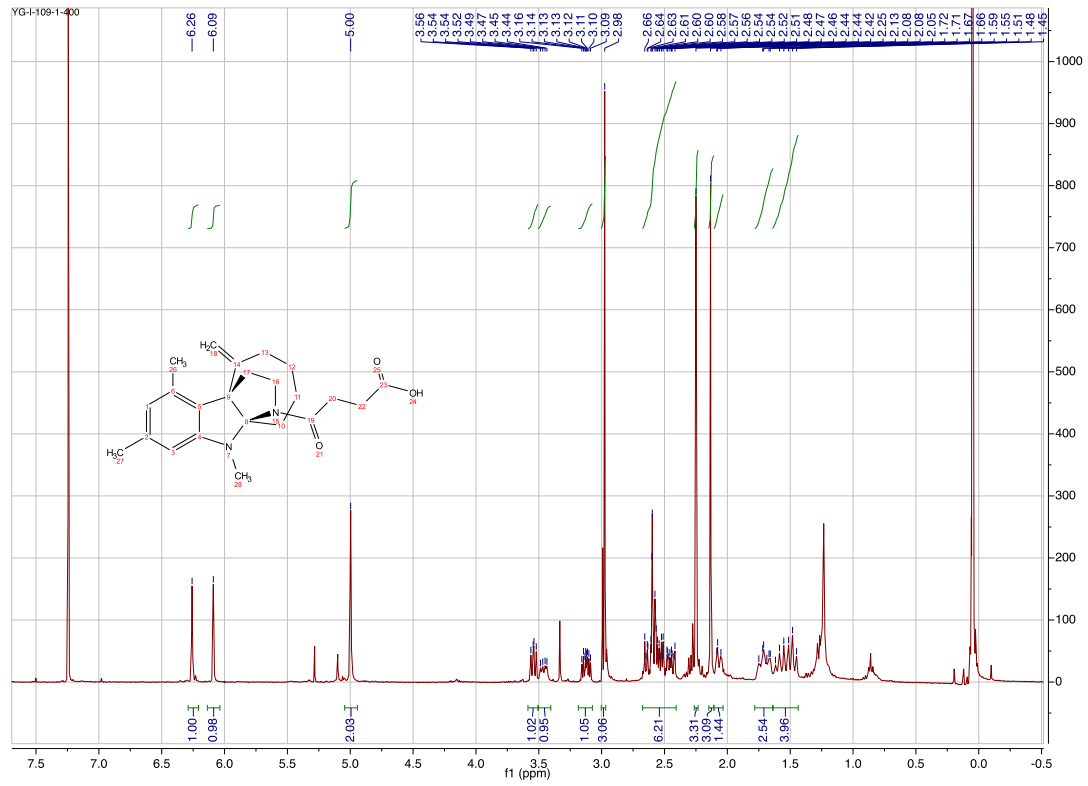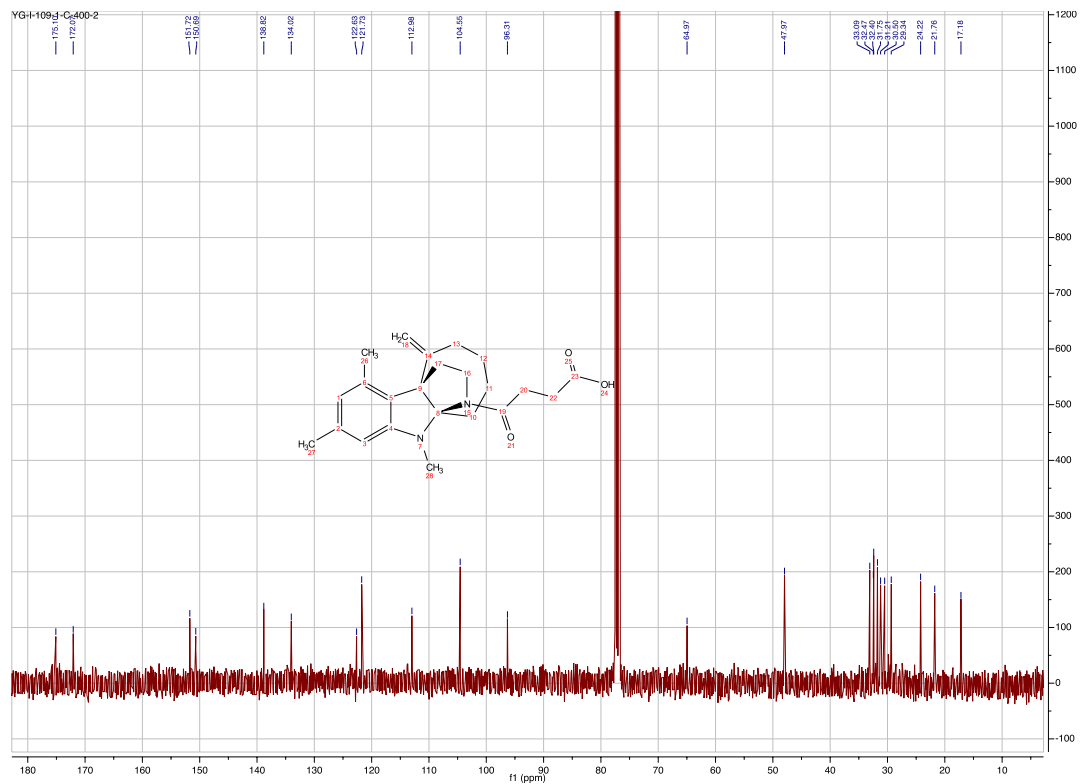

# Compound 6g

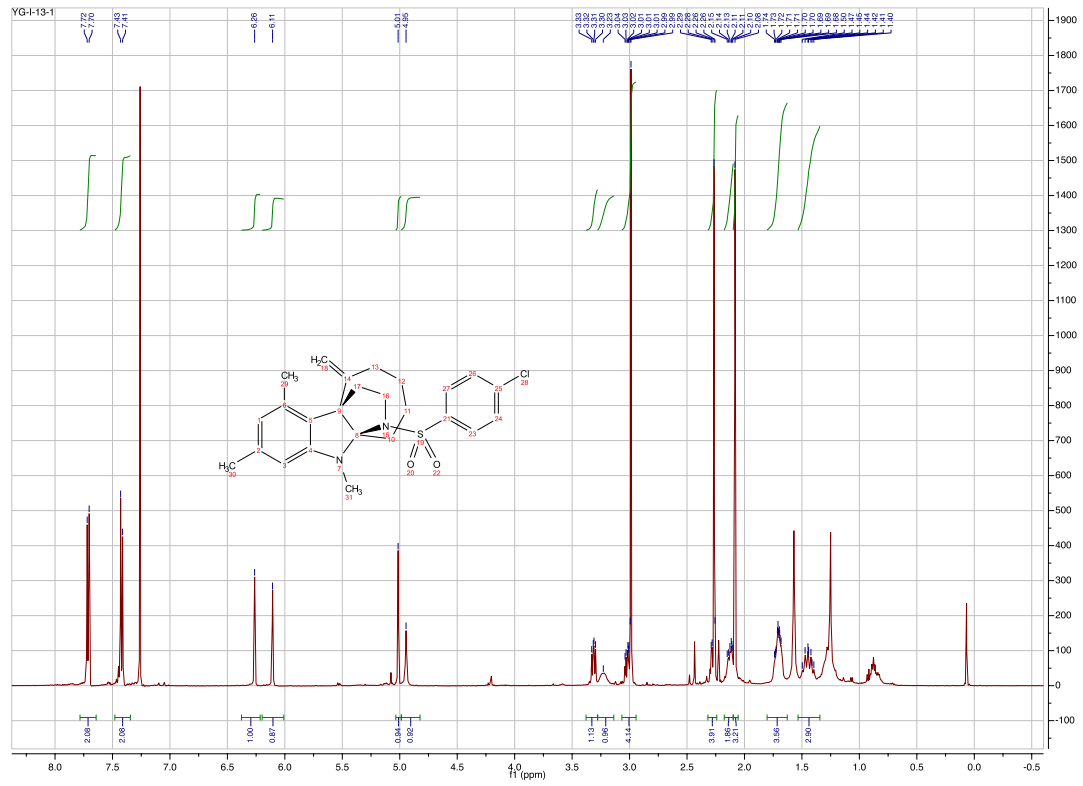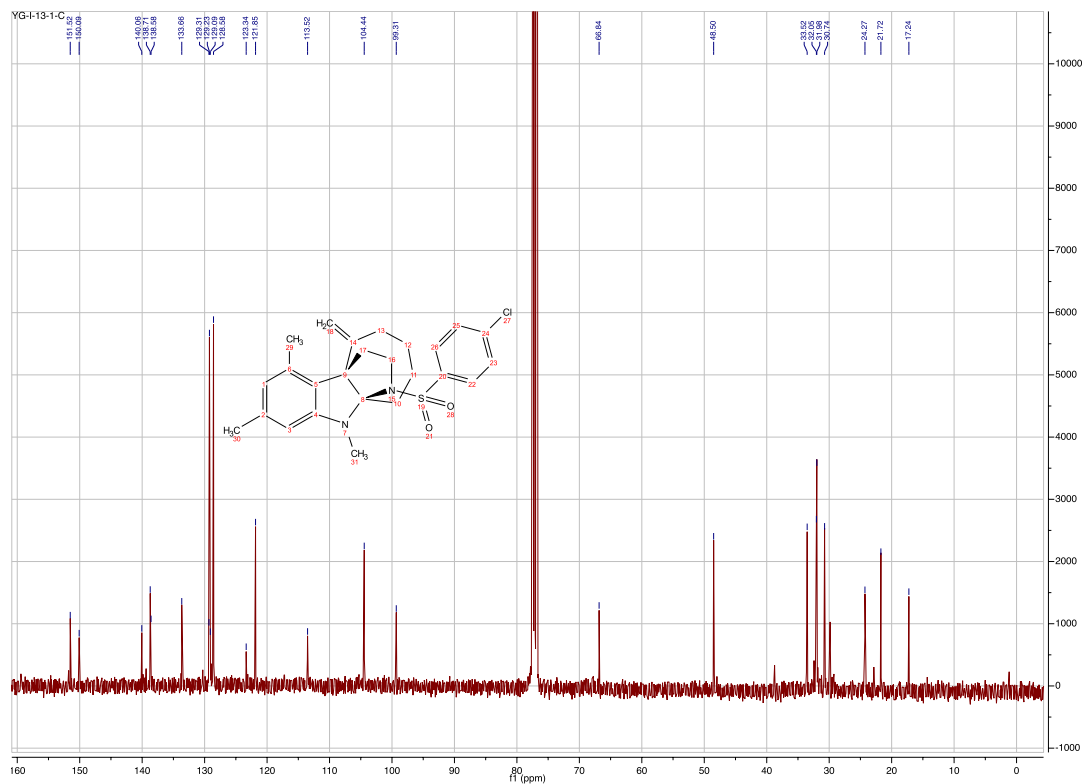

Compound 6h

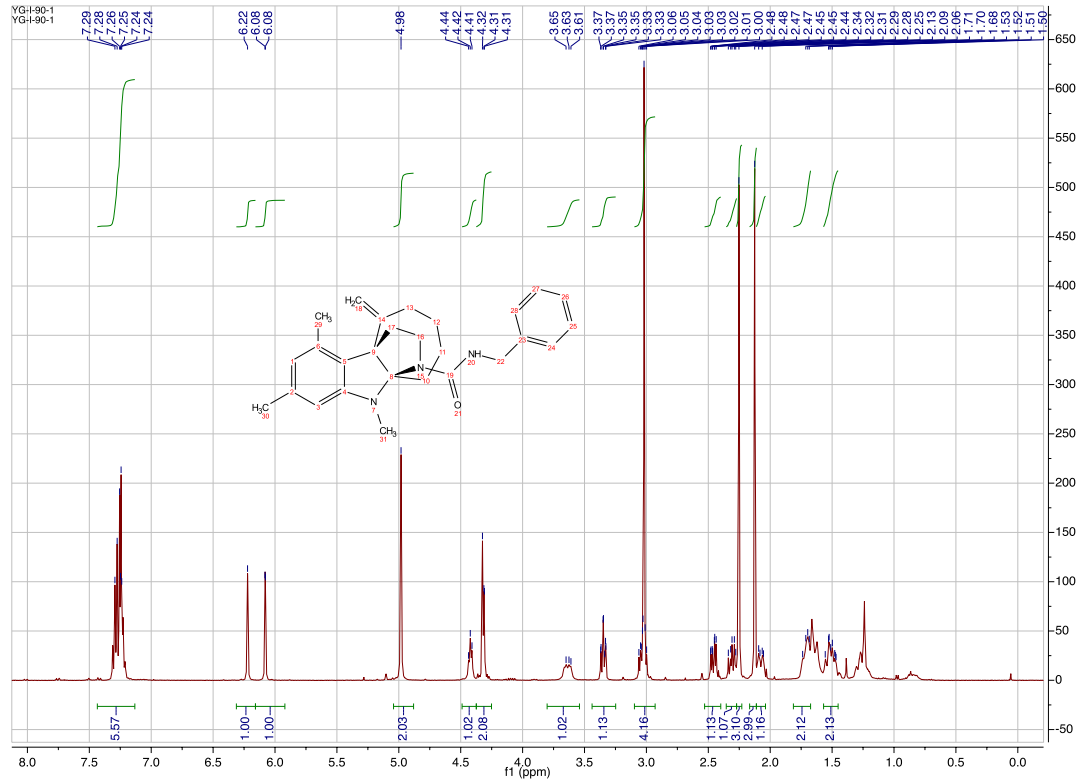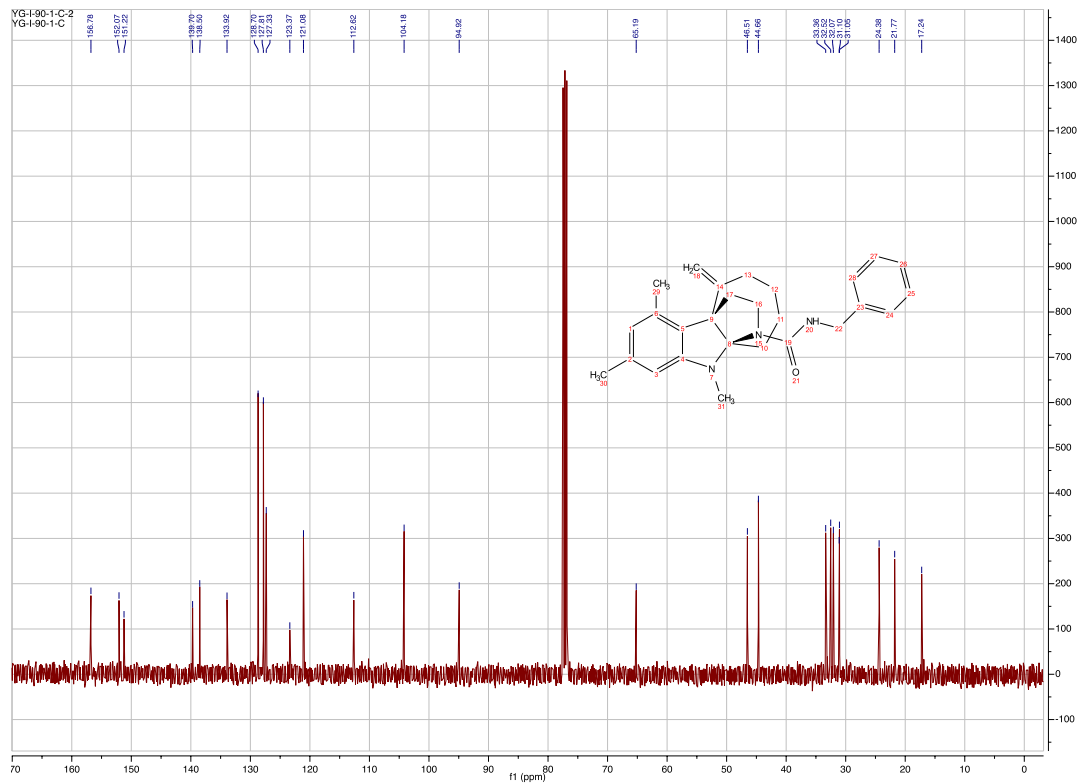

Compound **6i**

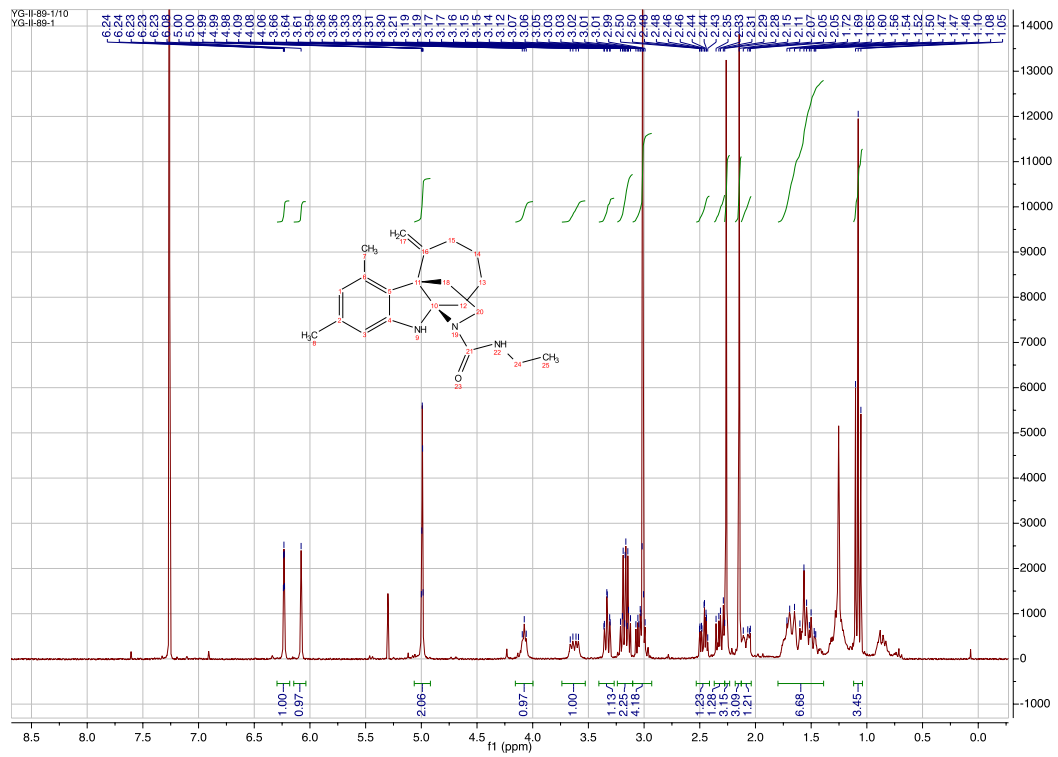

Compound **6j**

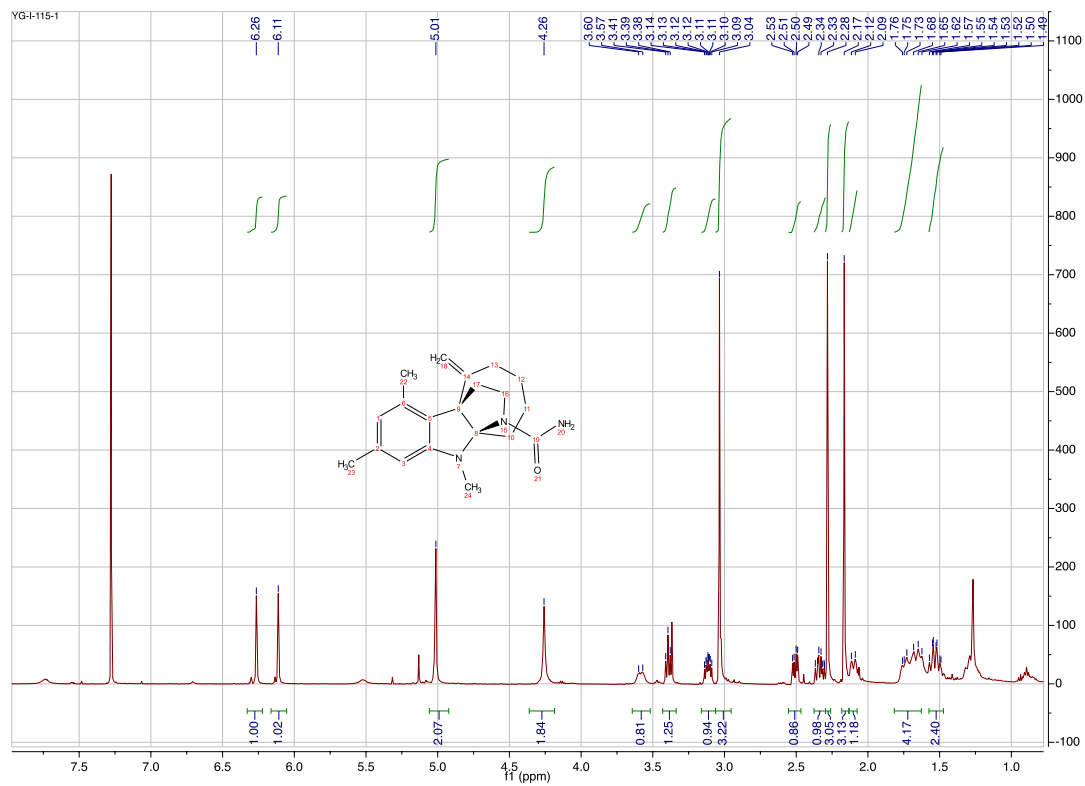

# Compound Boc-6k

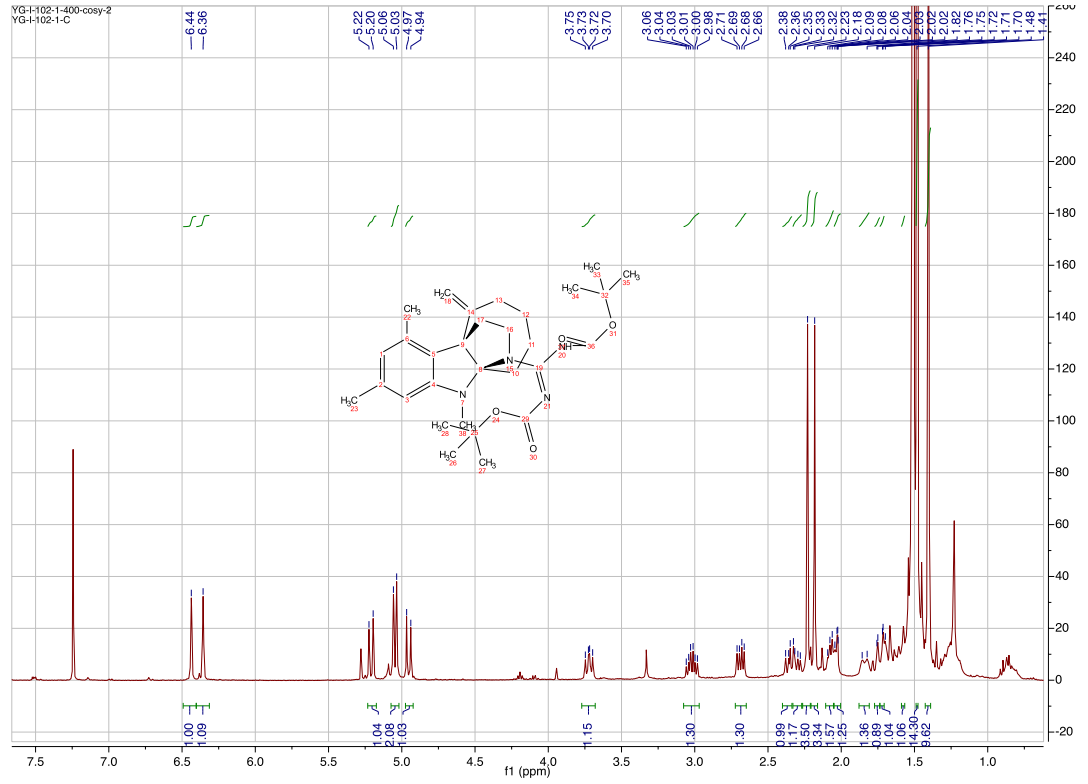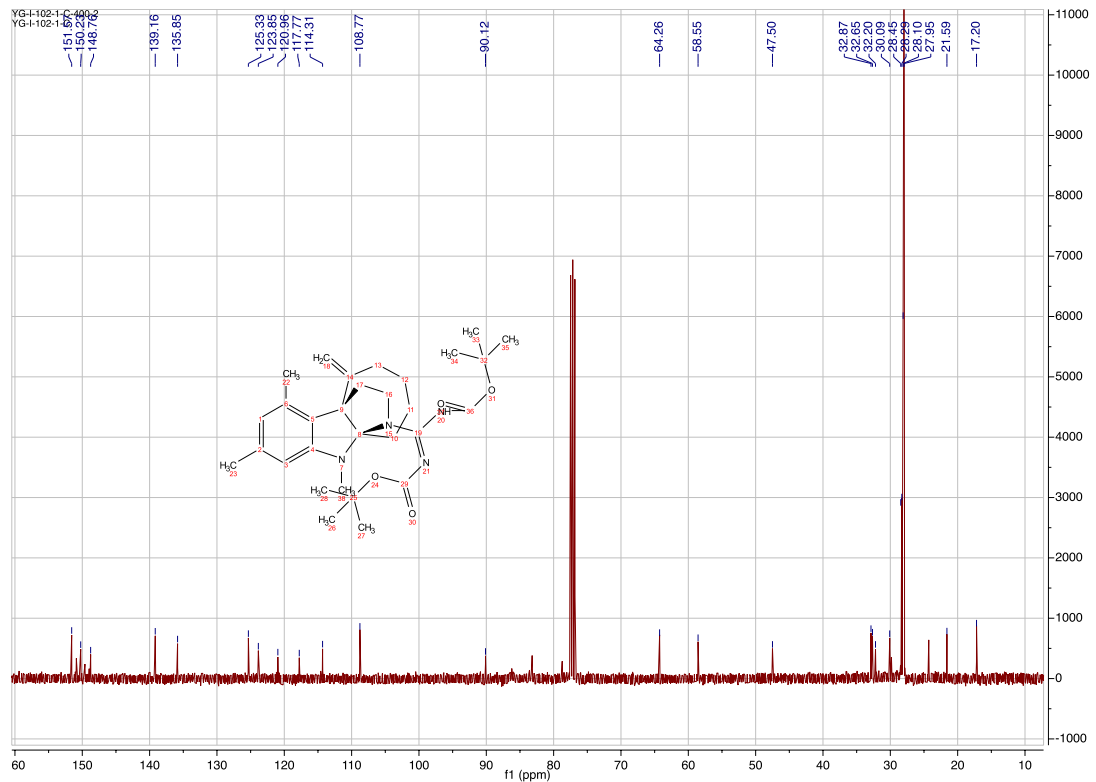

# Compound 6k

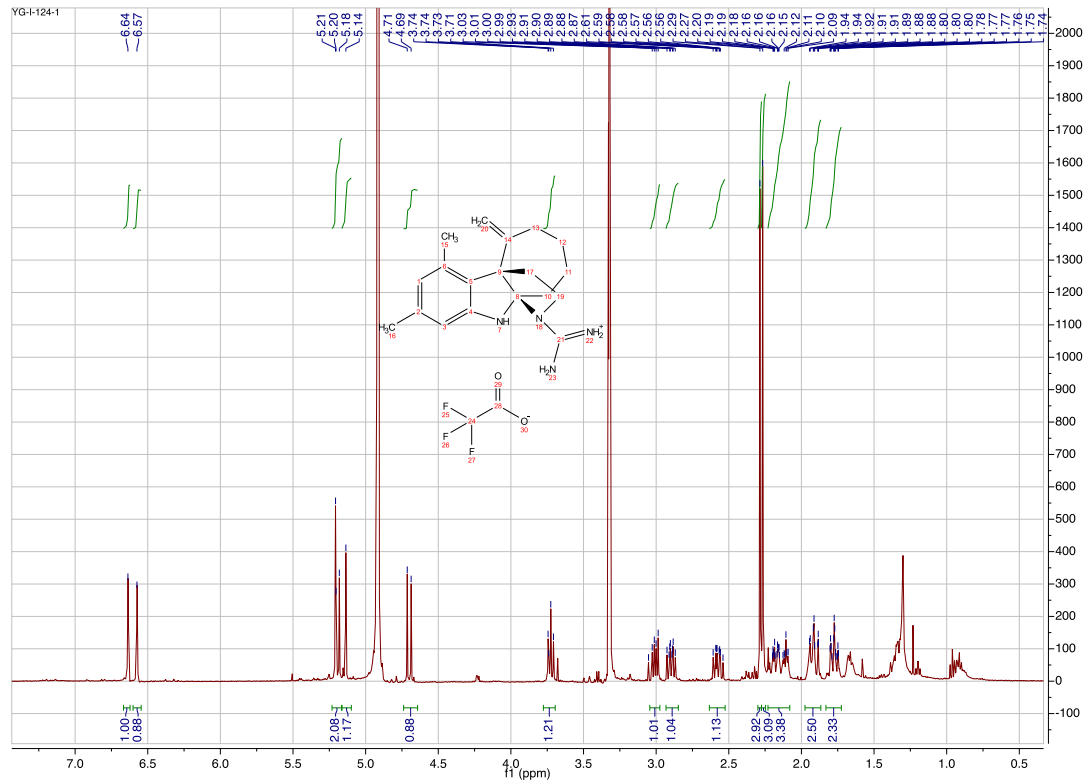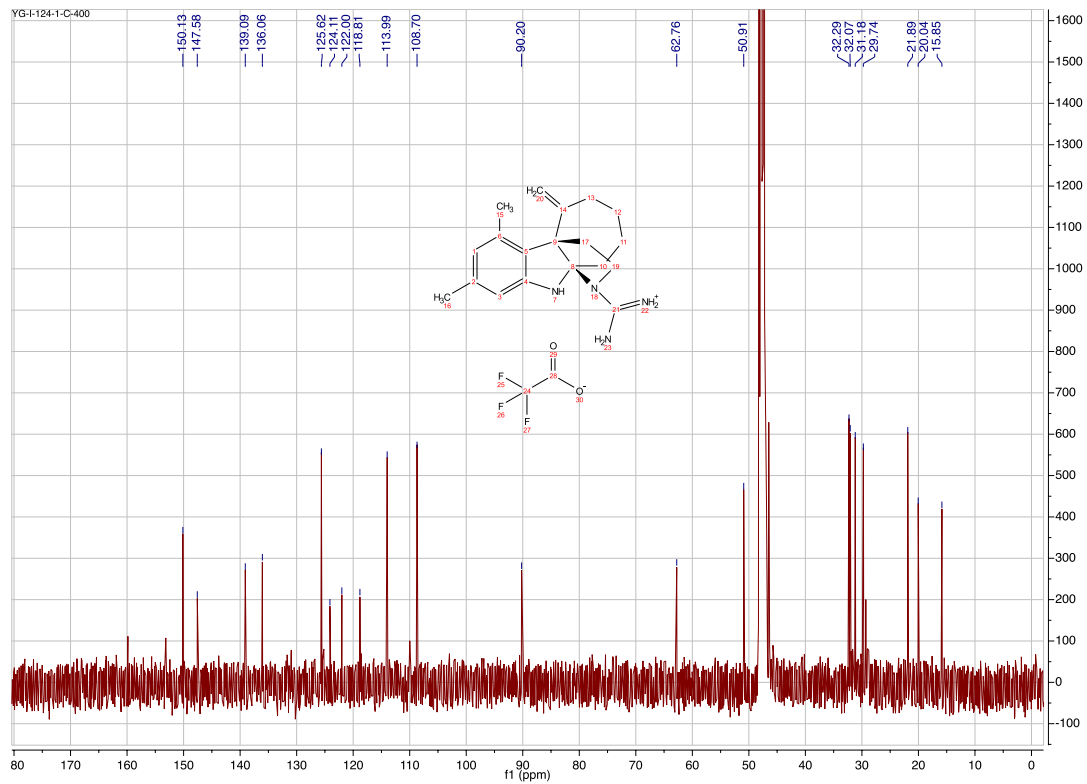

Compound **6l**

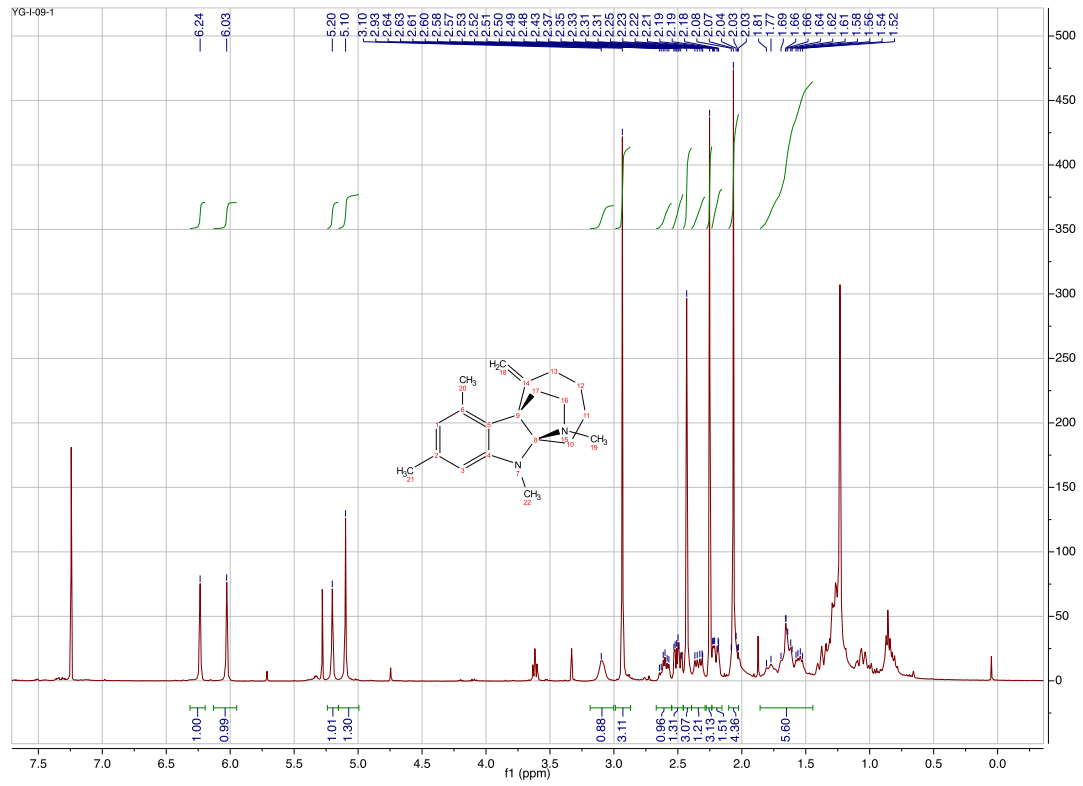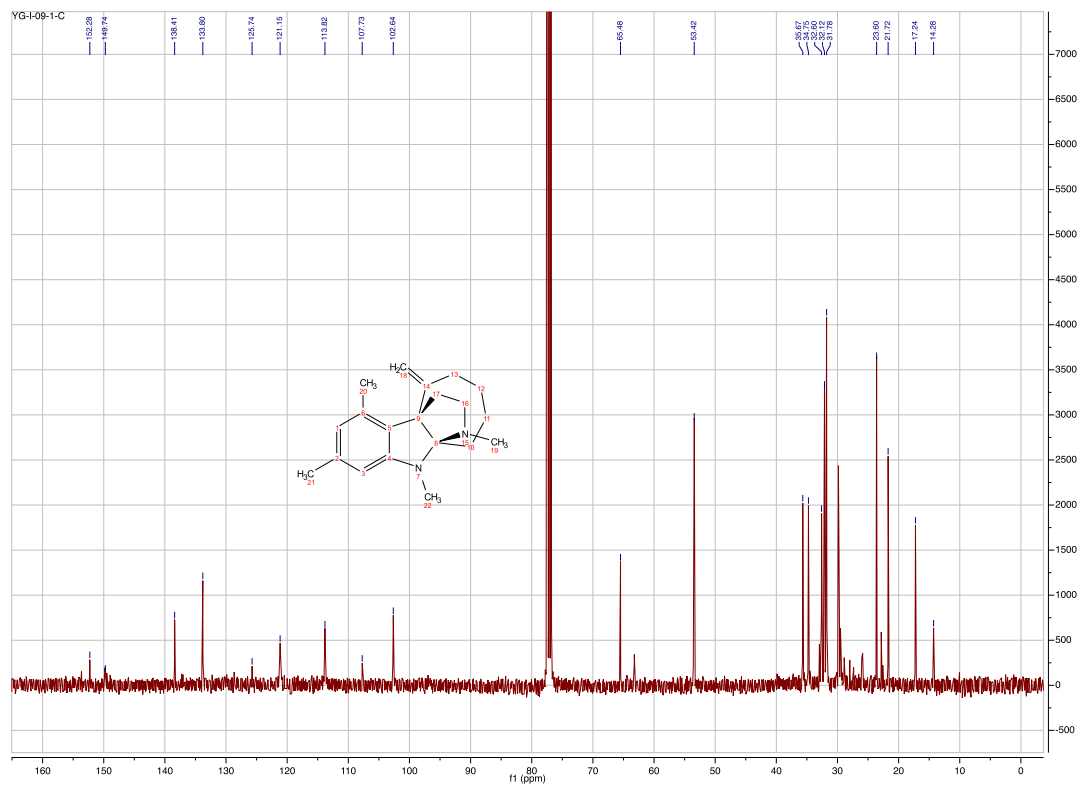

Compound **6m**

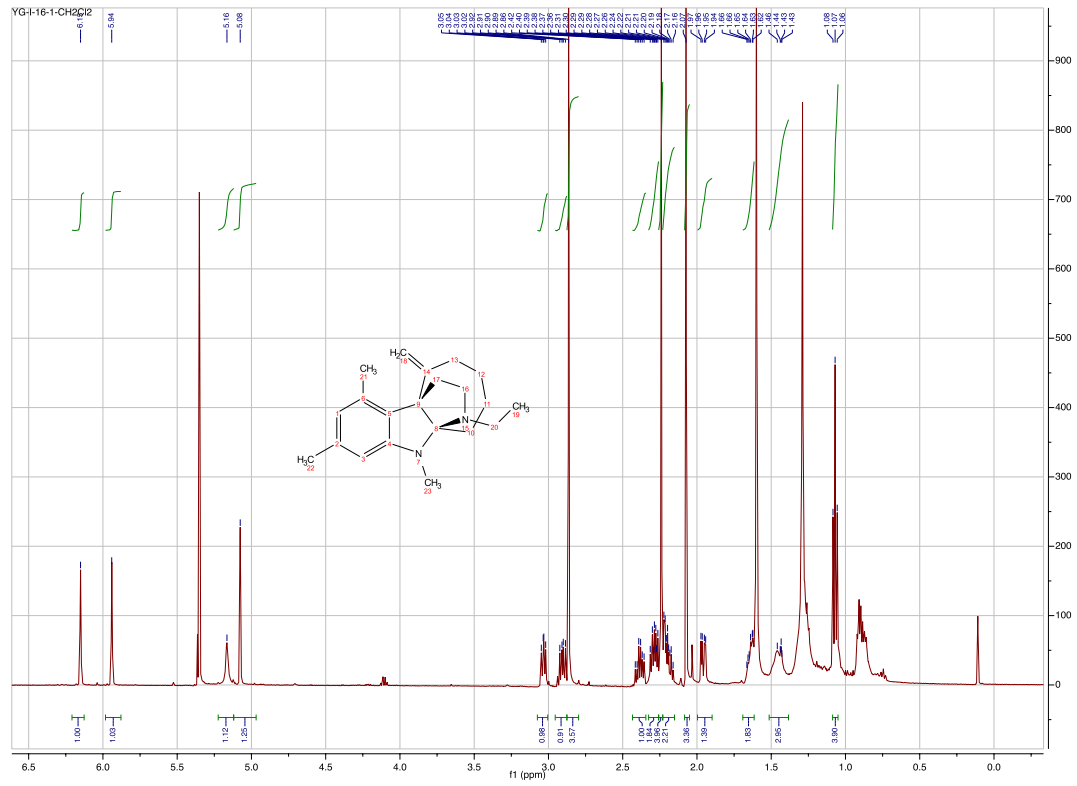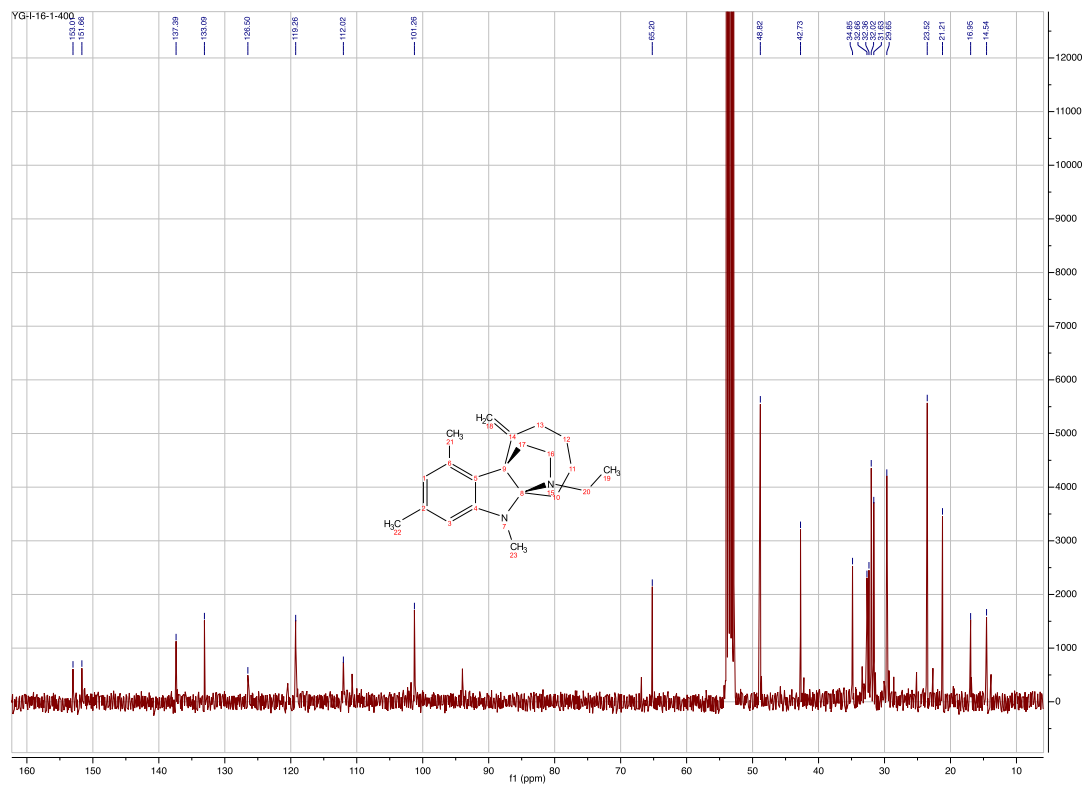



# Compound 9c

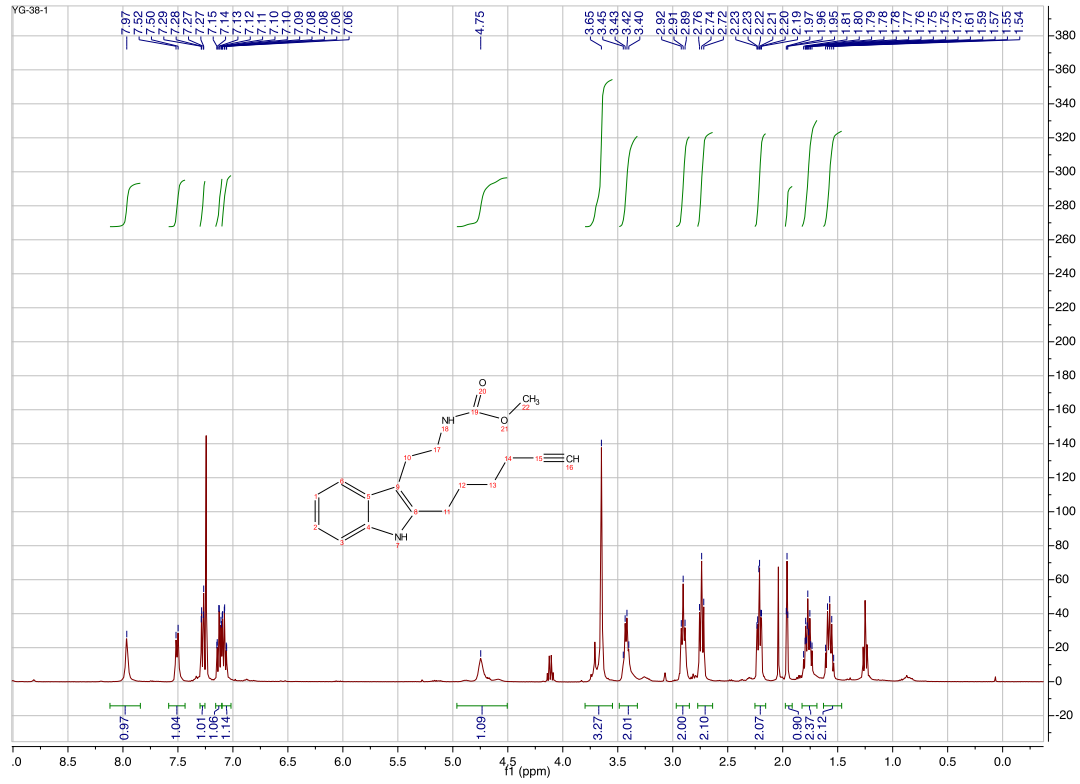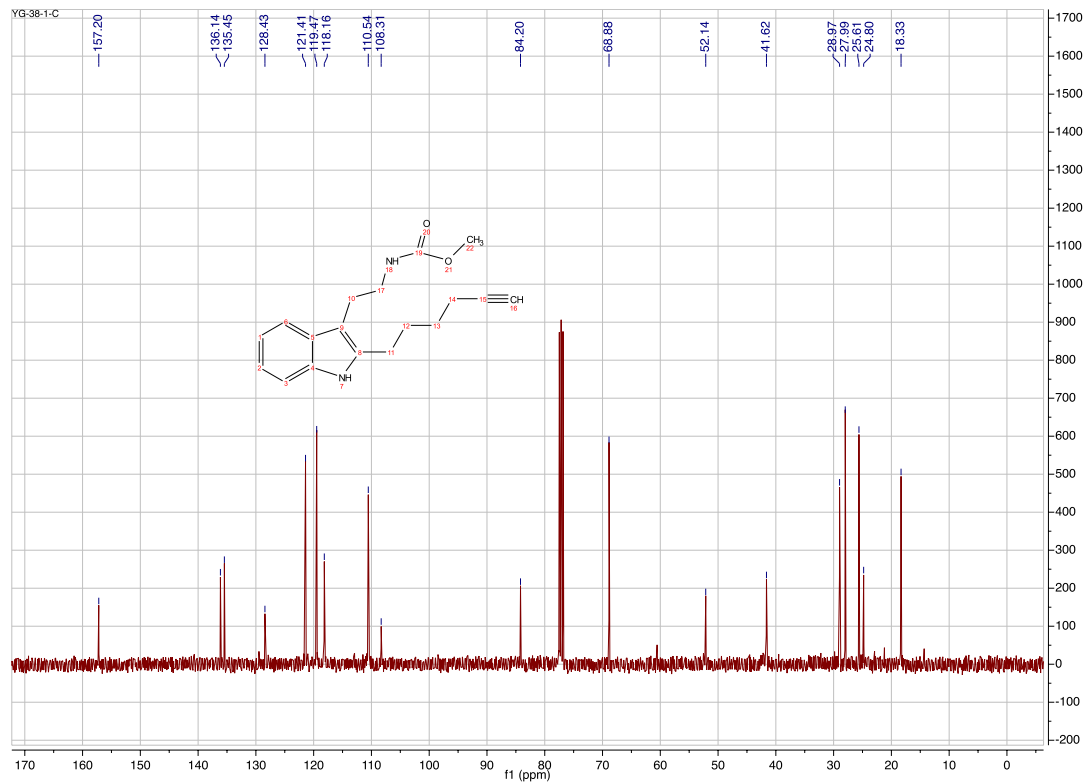

Compound 9d

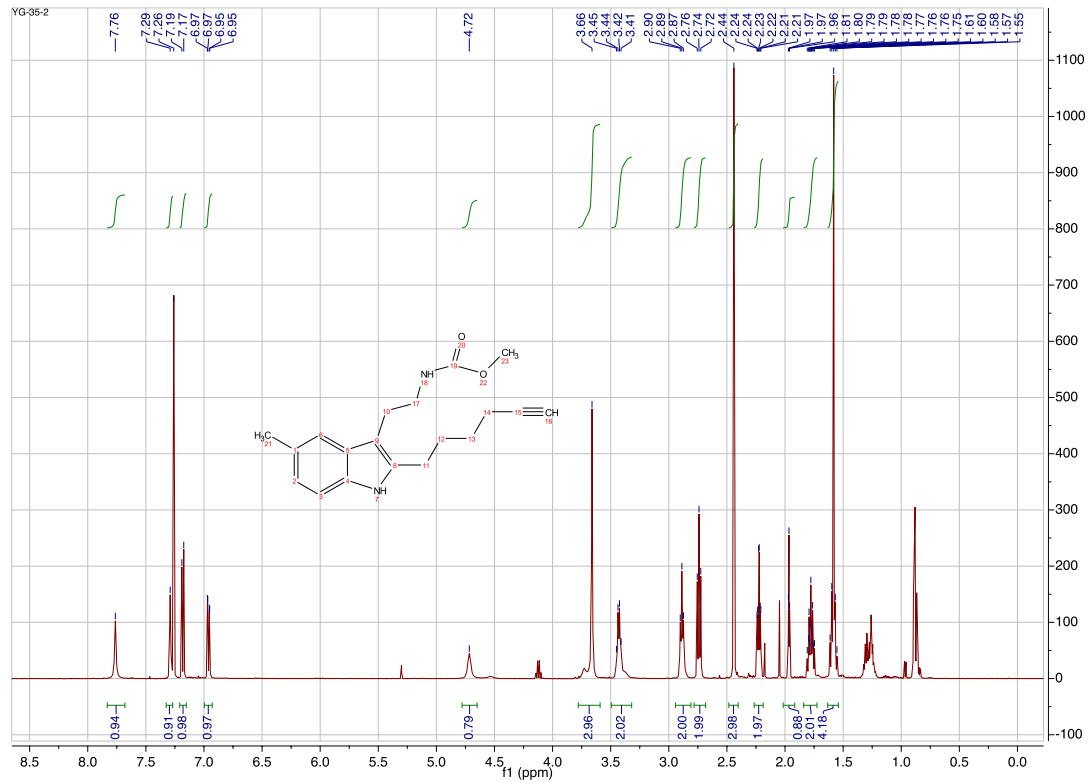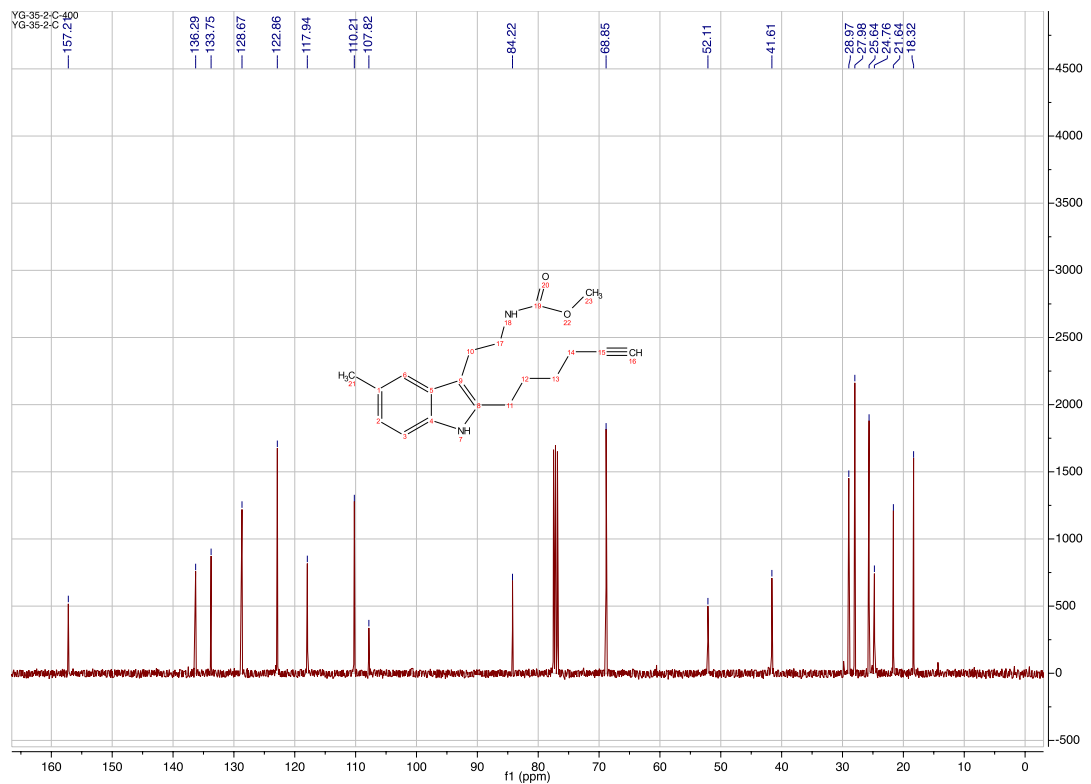

# Compound 9e

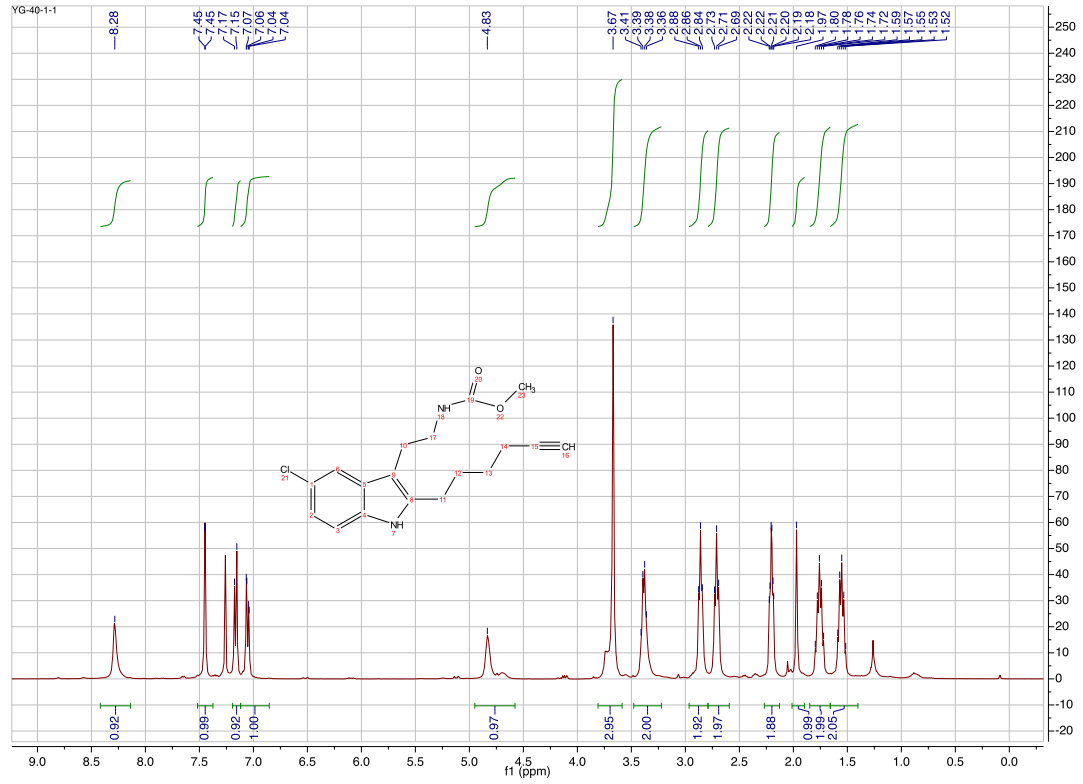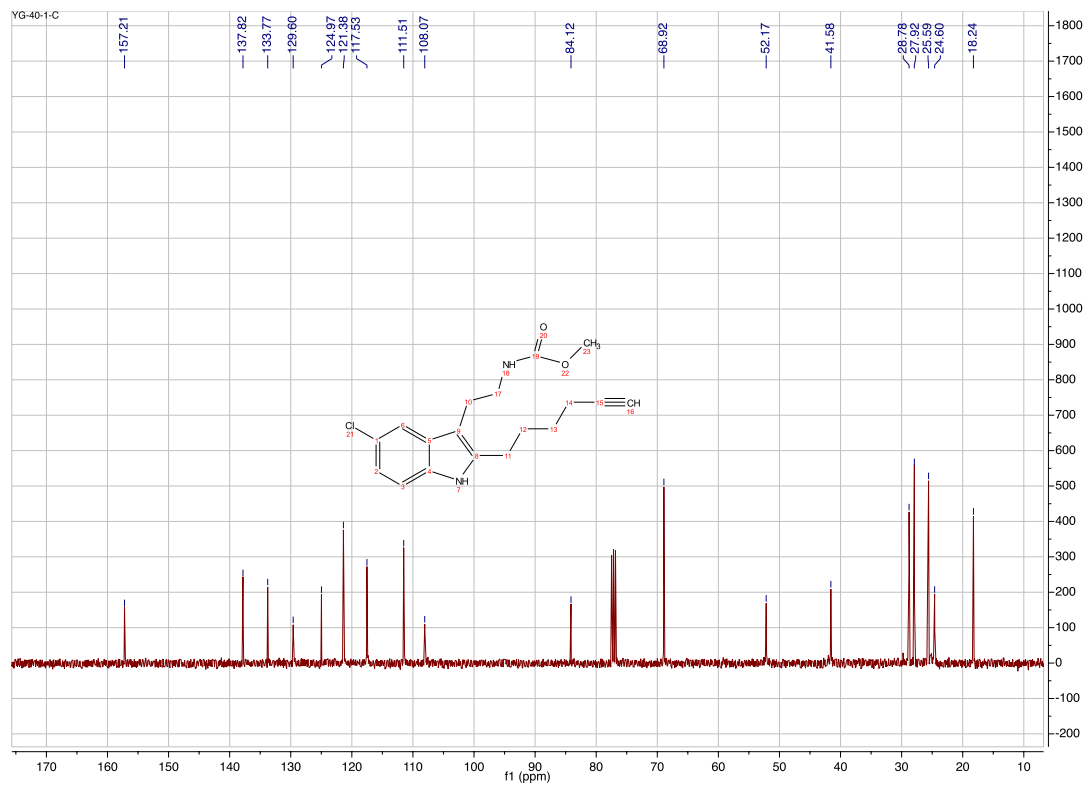

Compound 9f

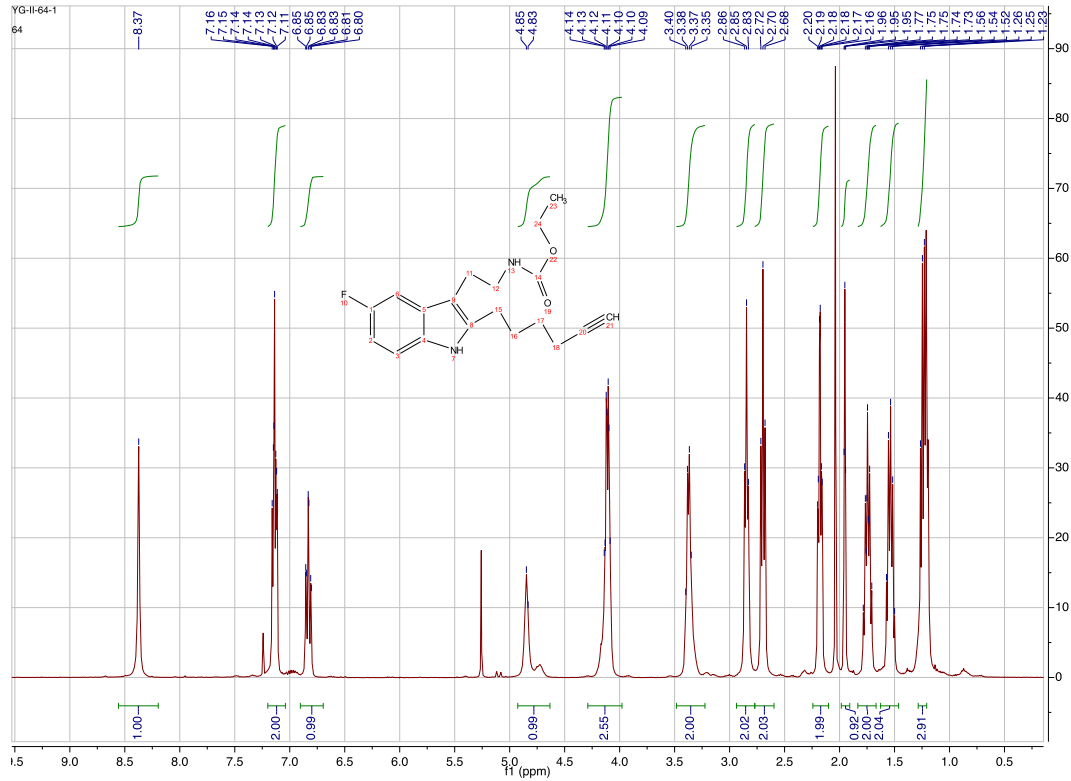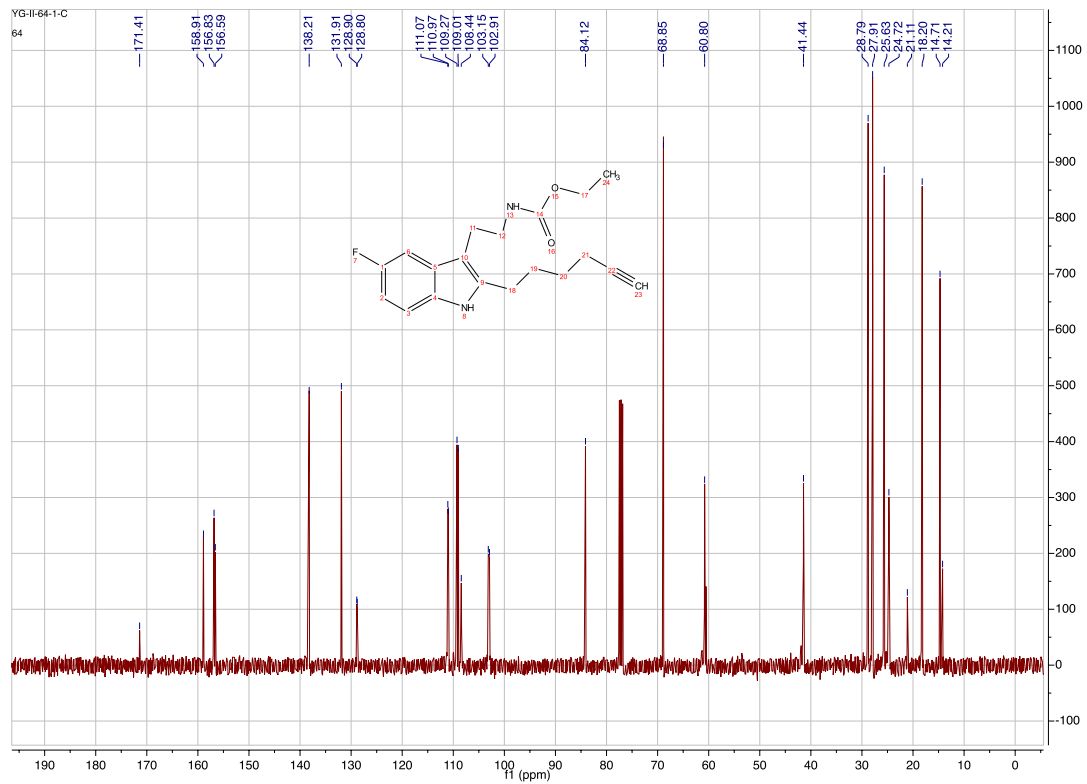

# Compound 9g

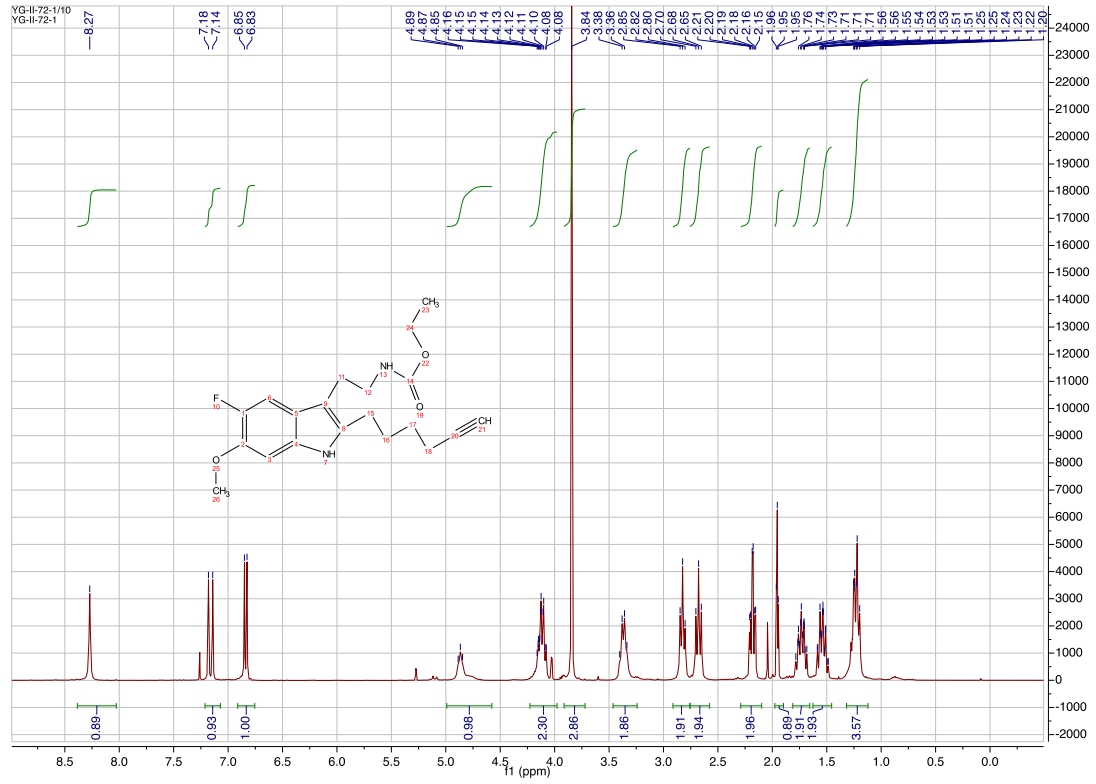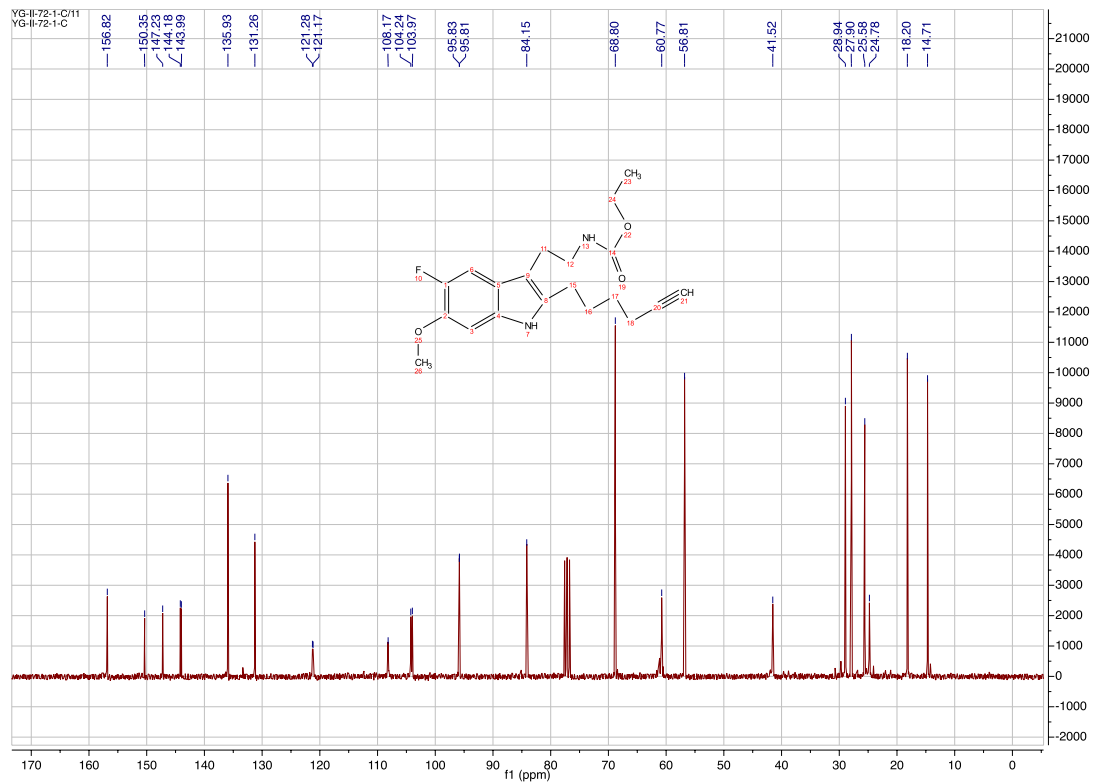

# Compound 10a

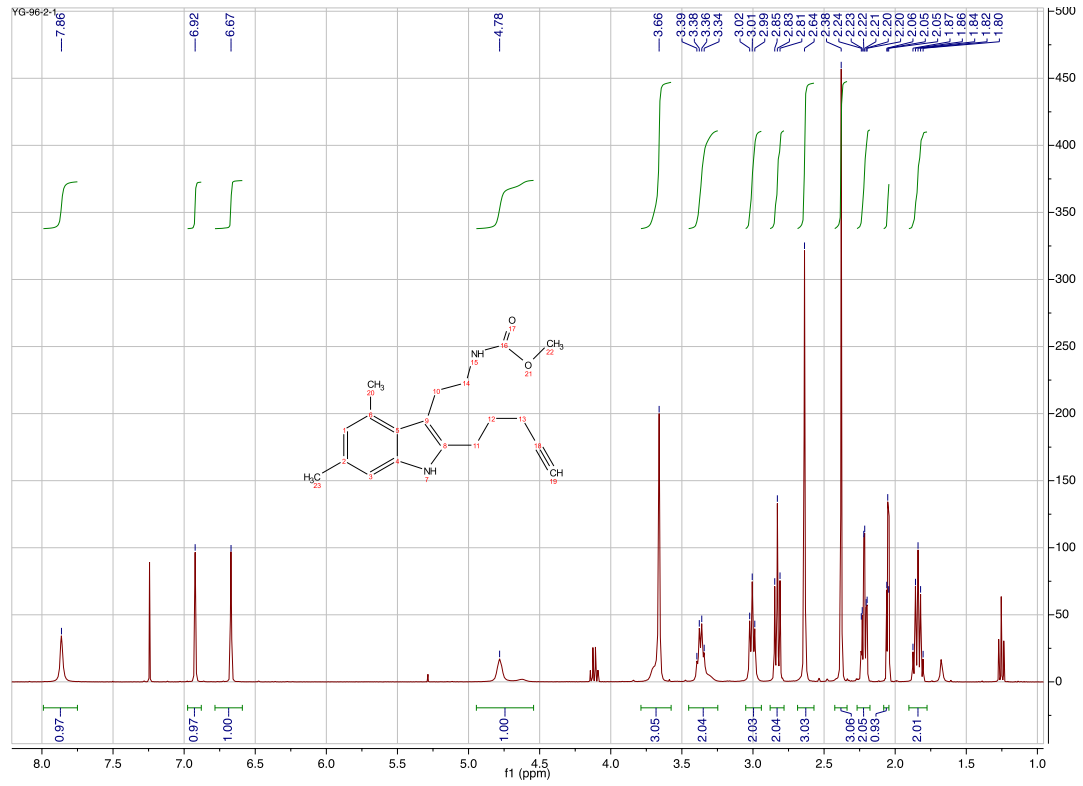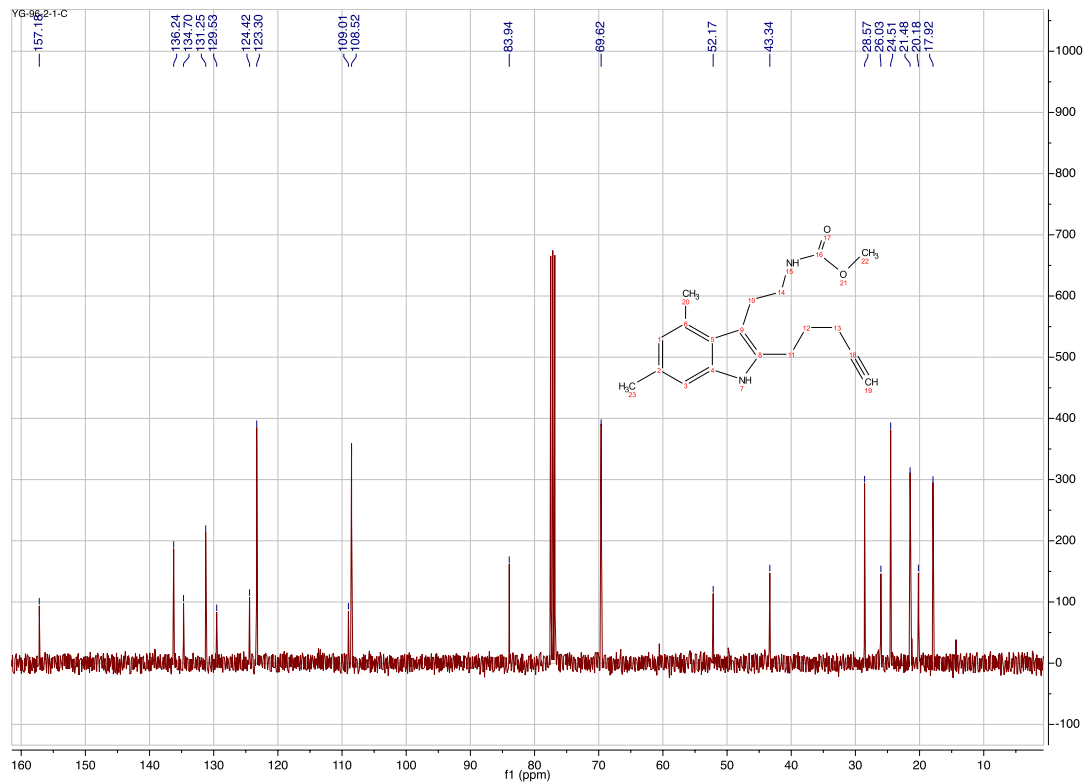

# Compound 10b

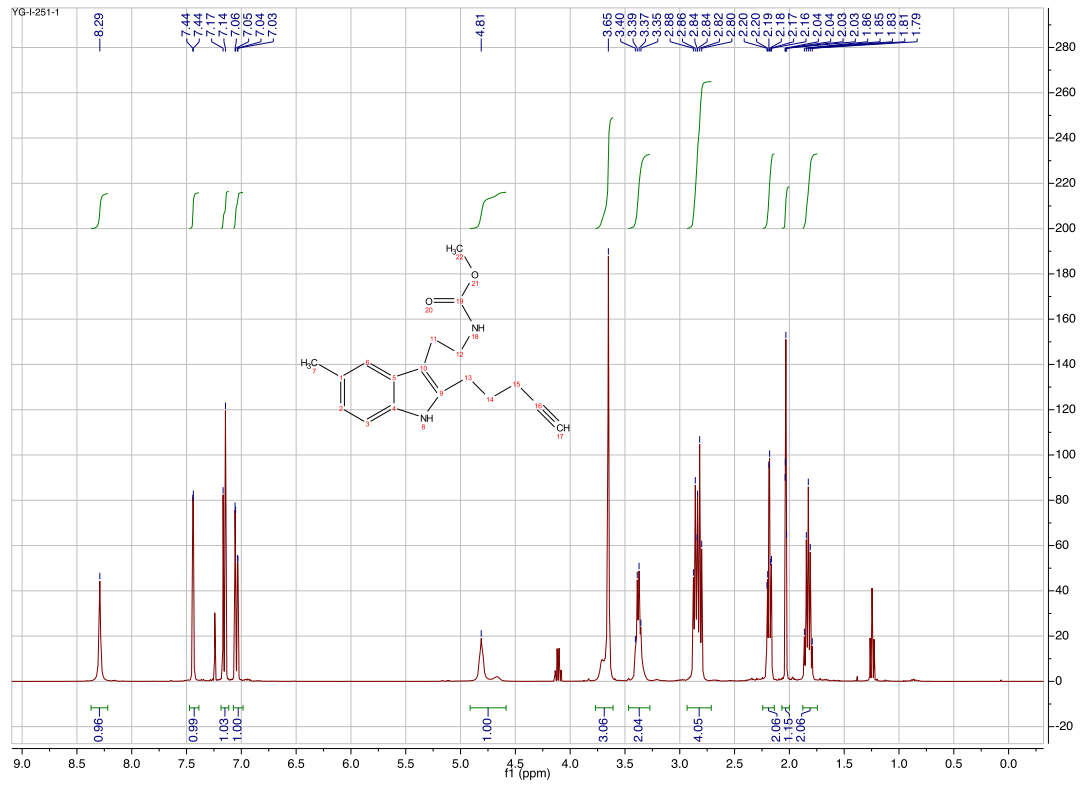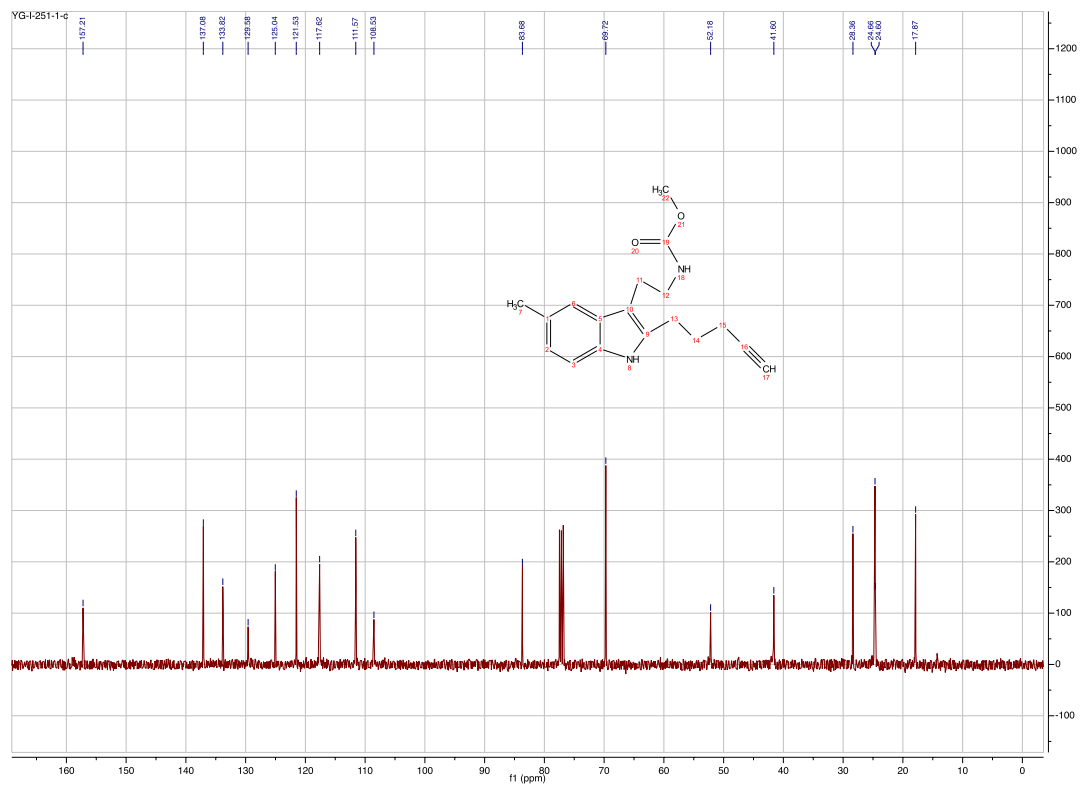

# Compound 10c

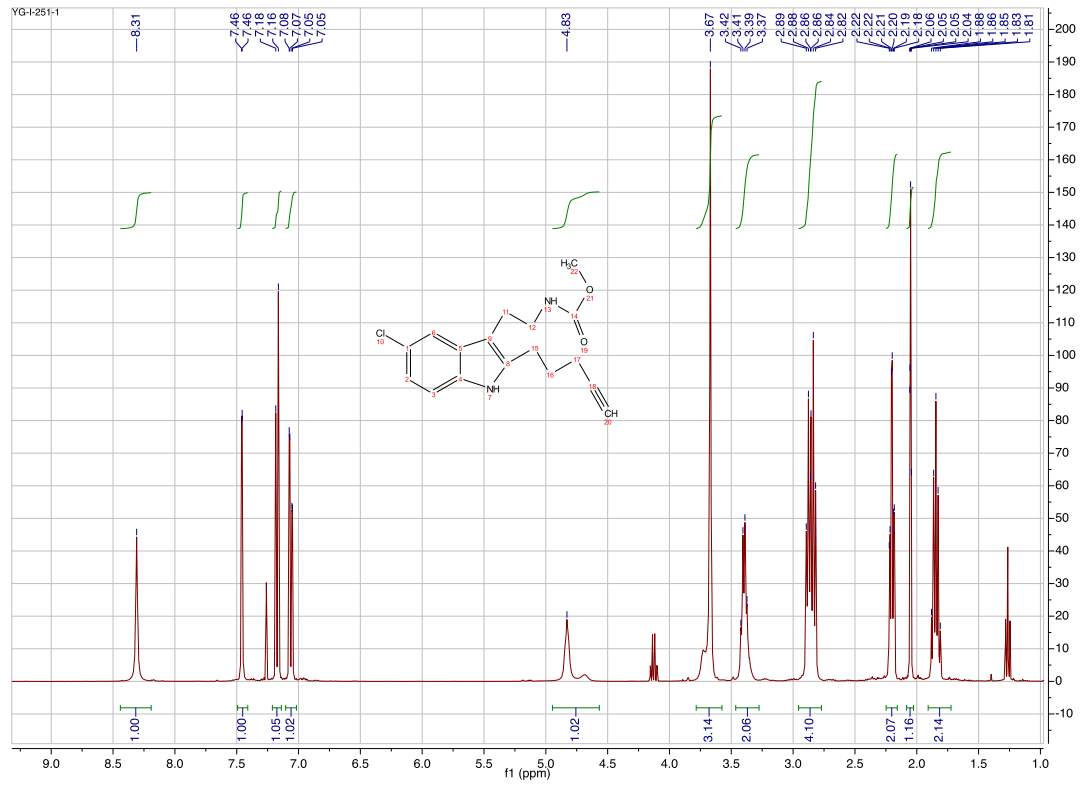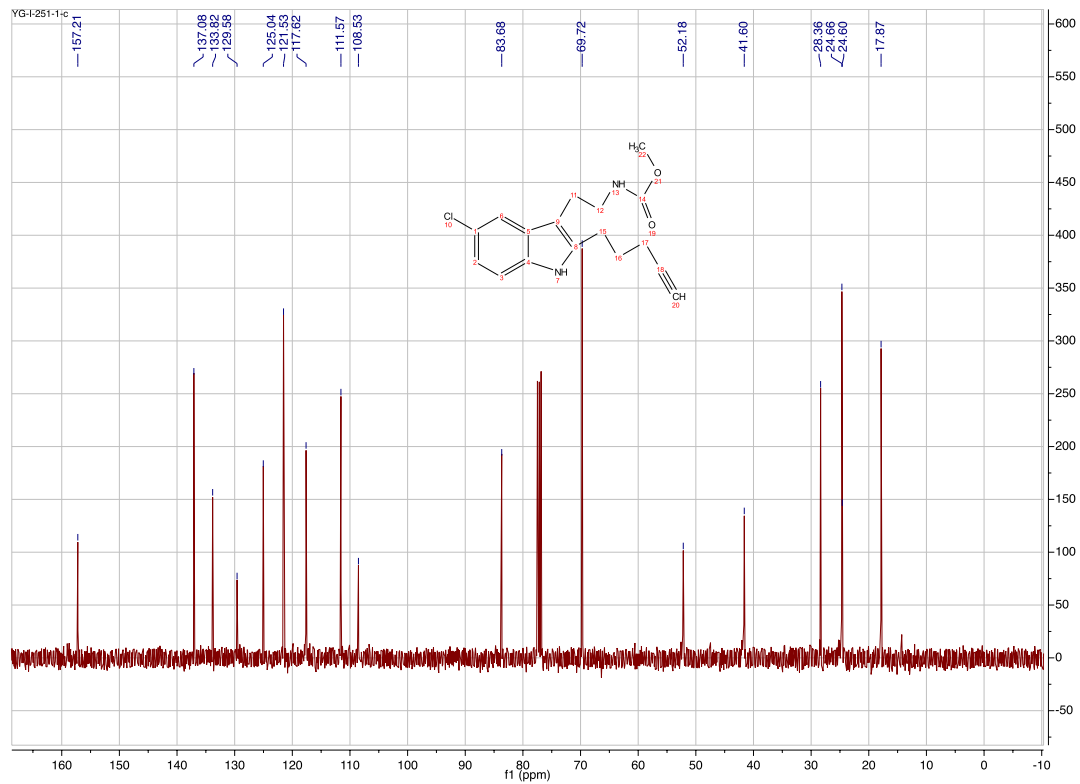



# Compound 10e

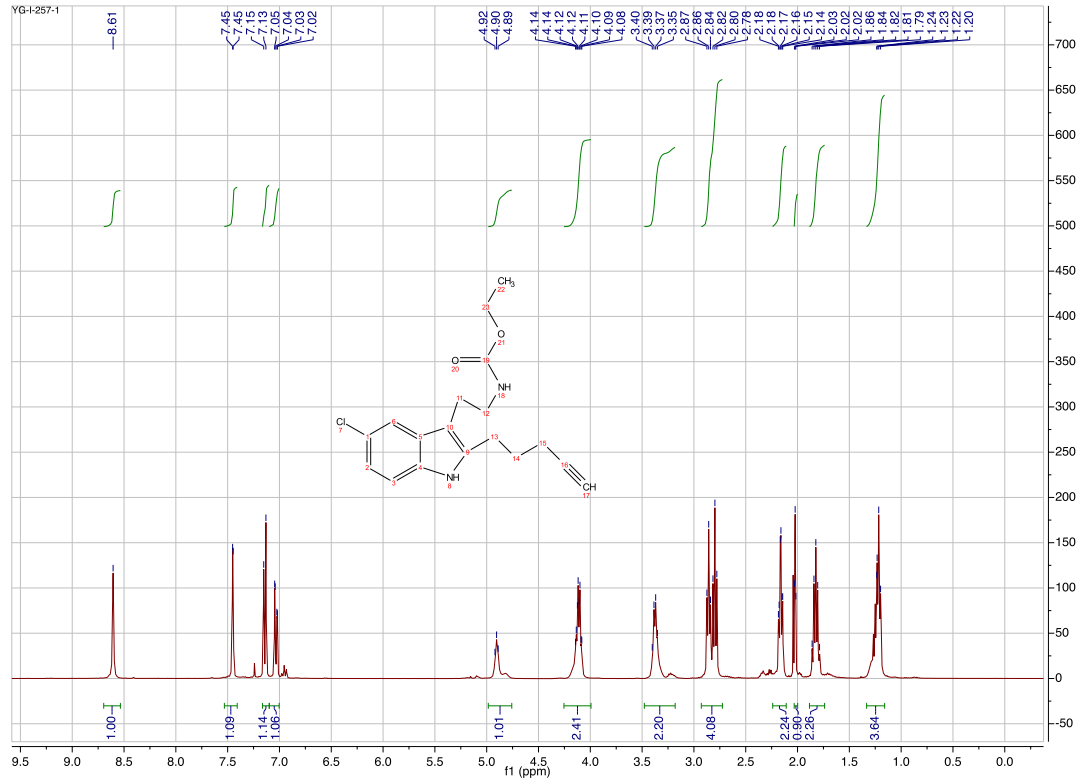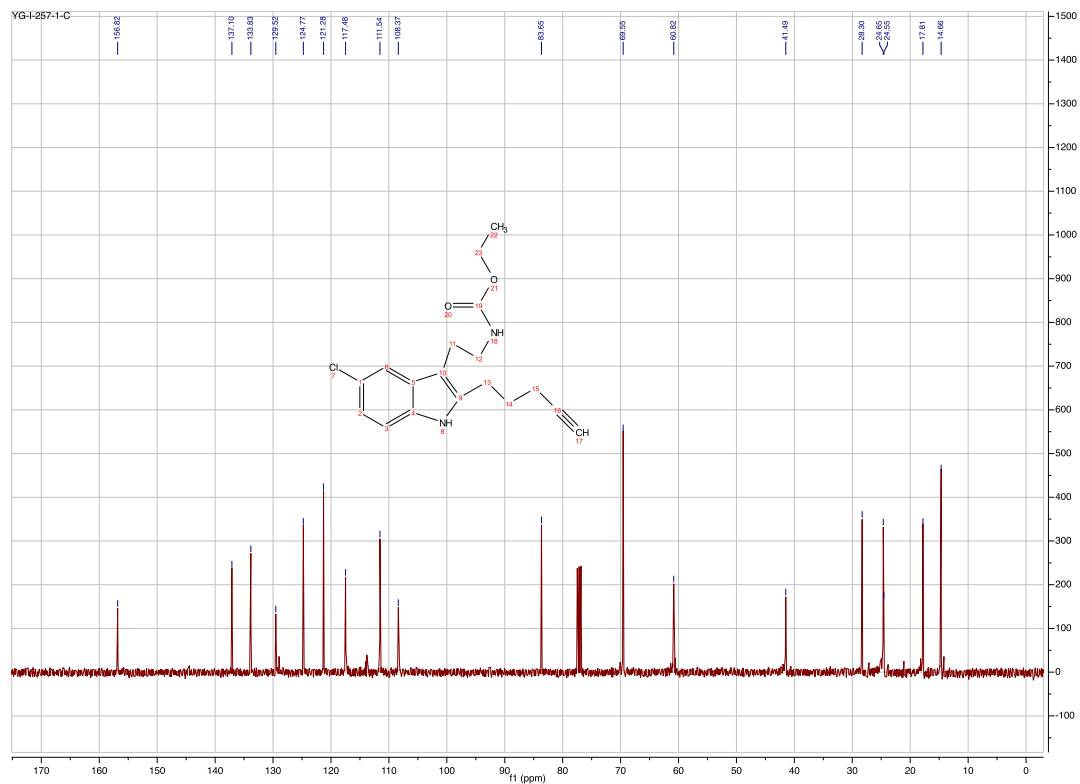

Compound 11c

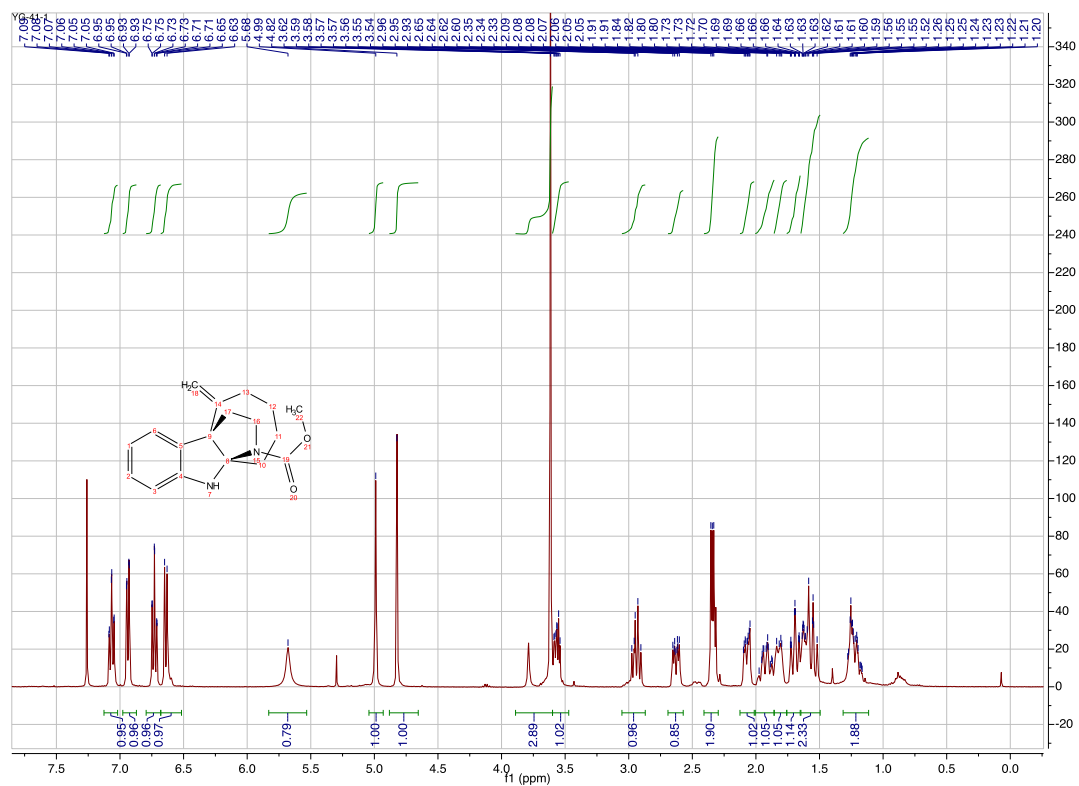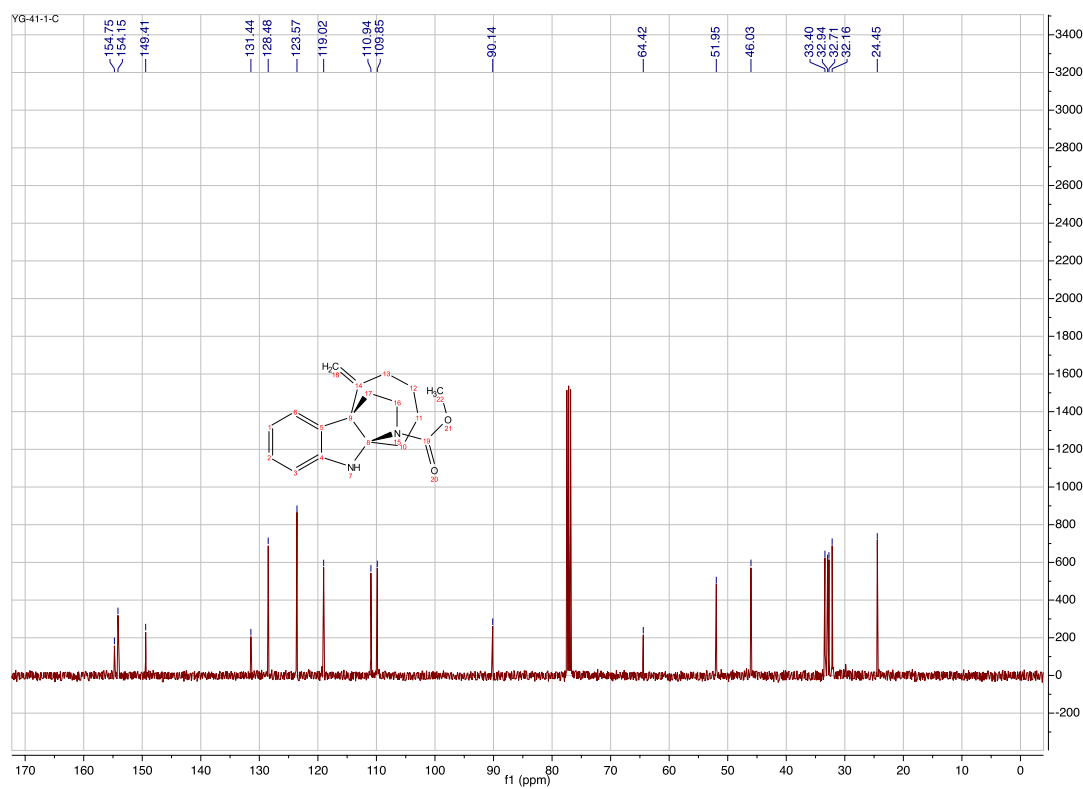

Compound 11d

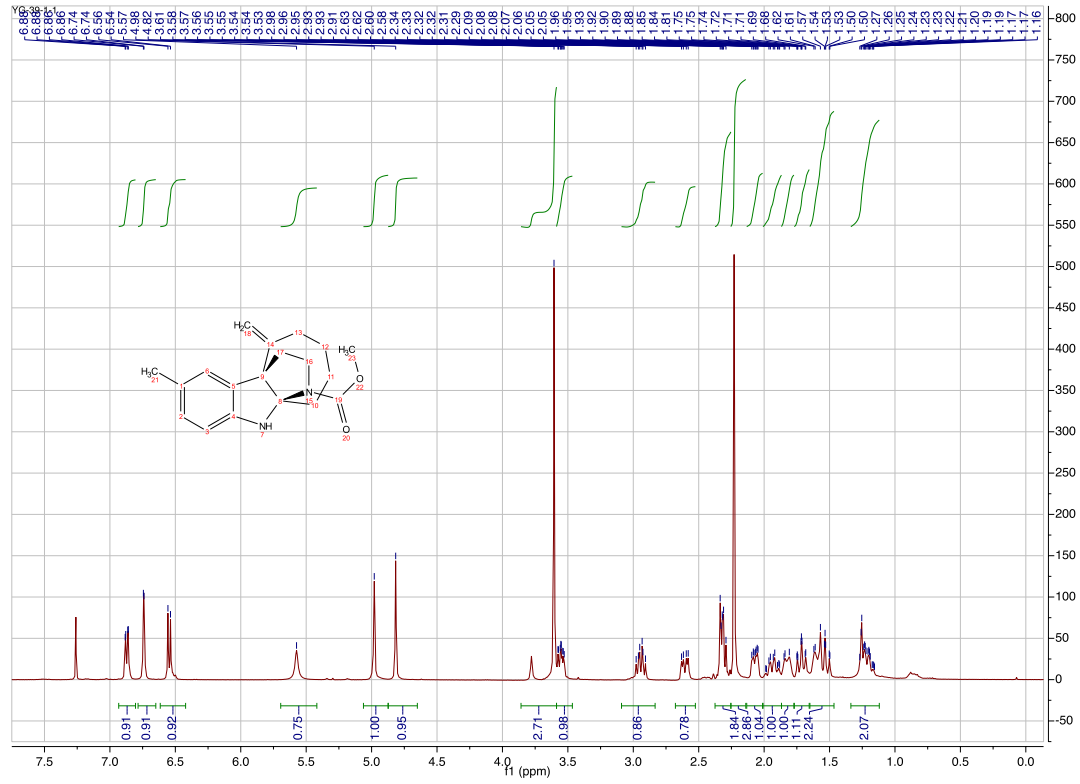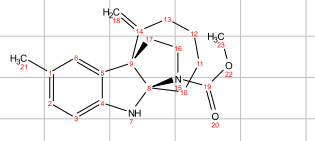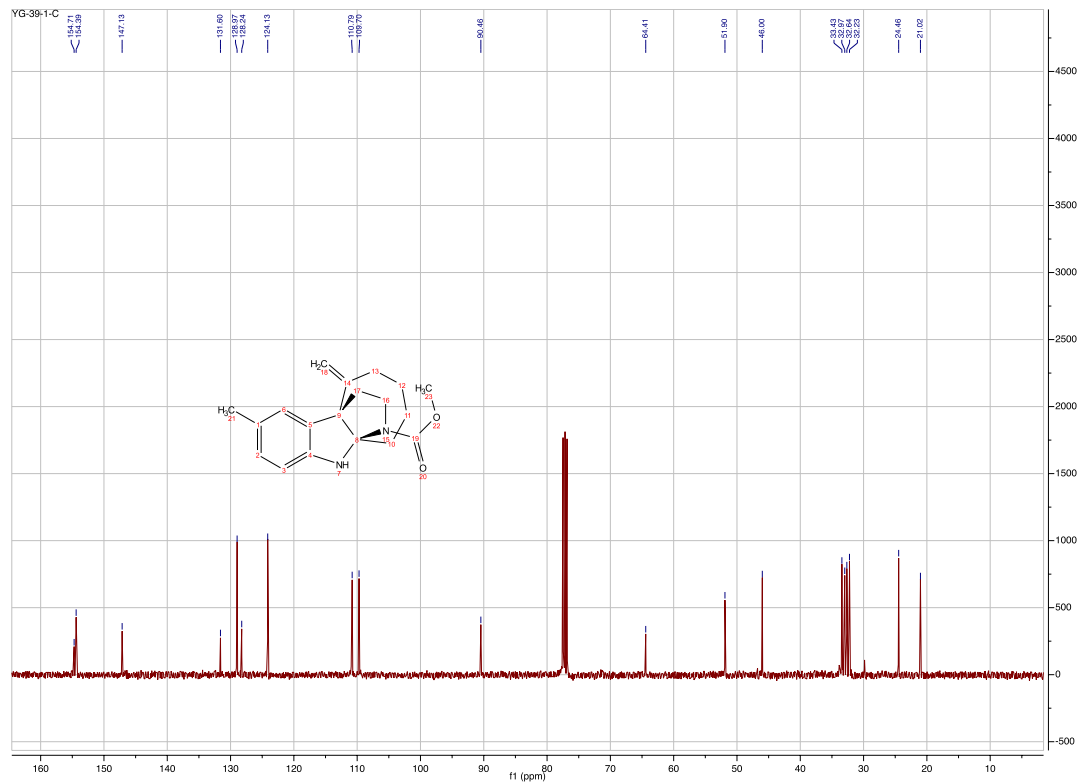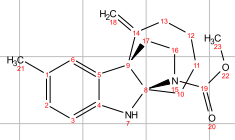

# Compound 11e

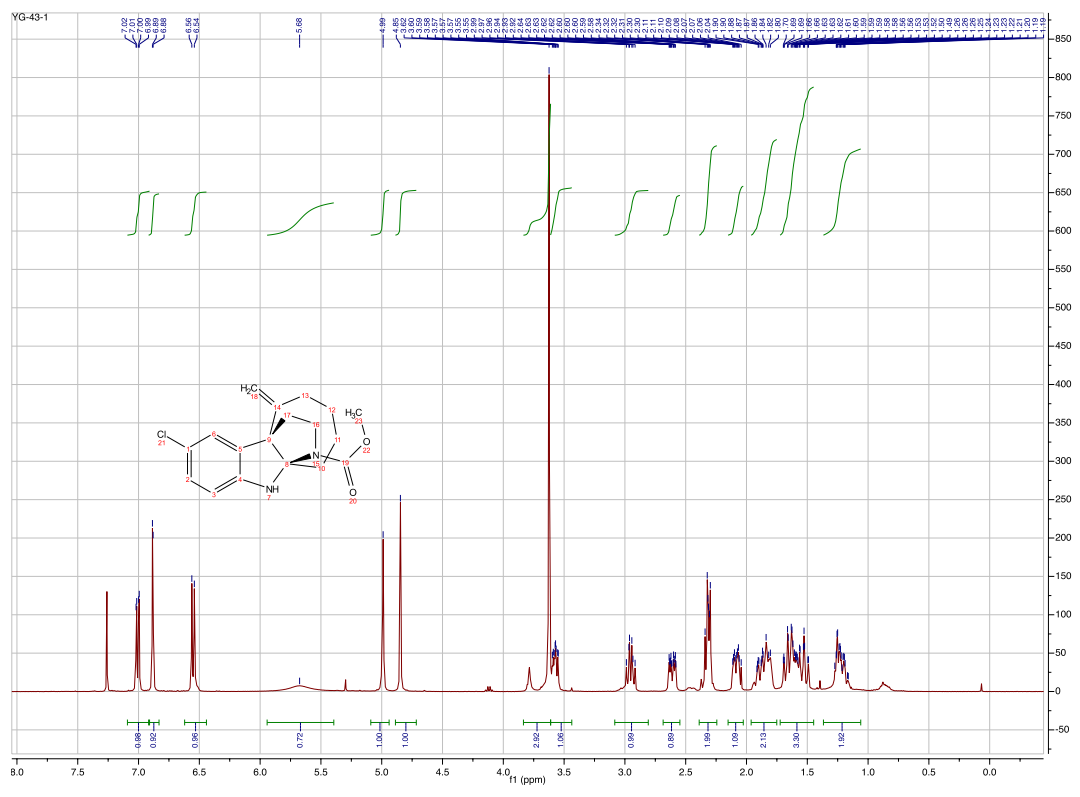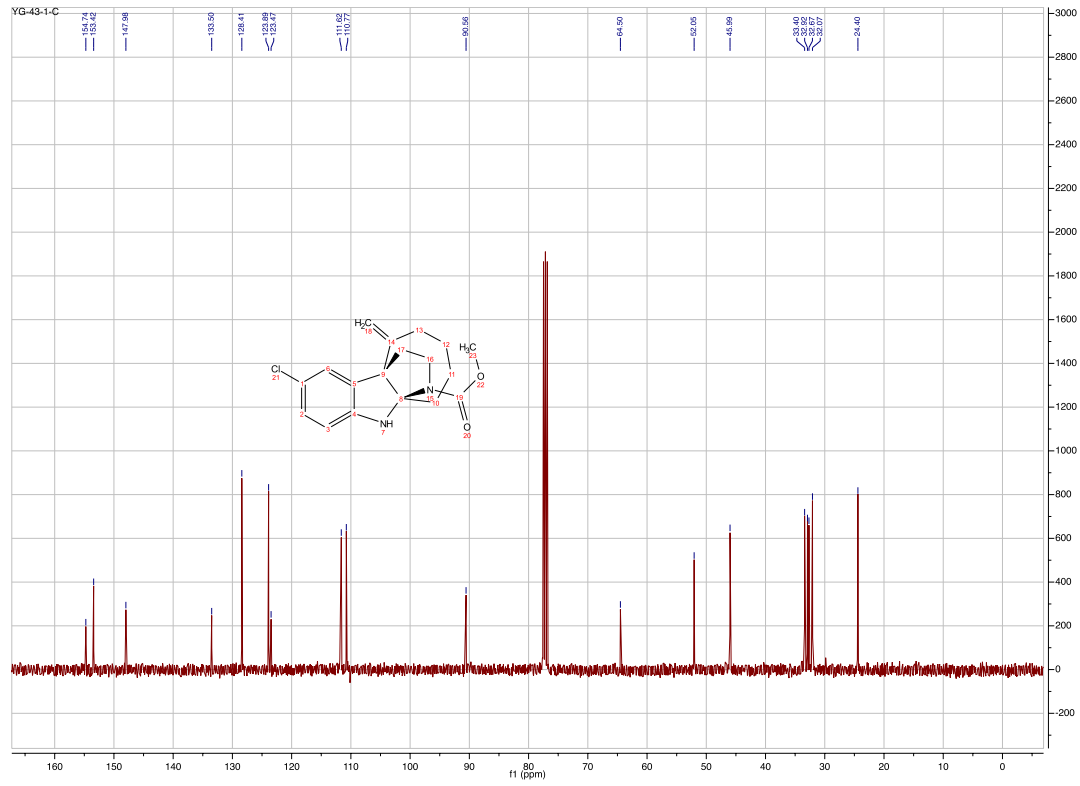

Compound **11f**

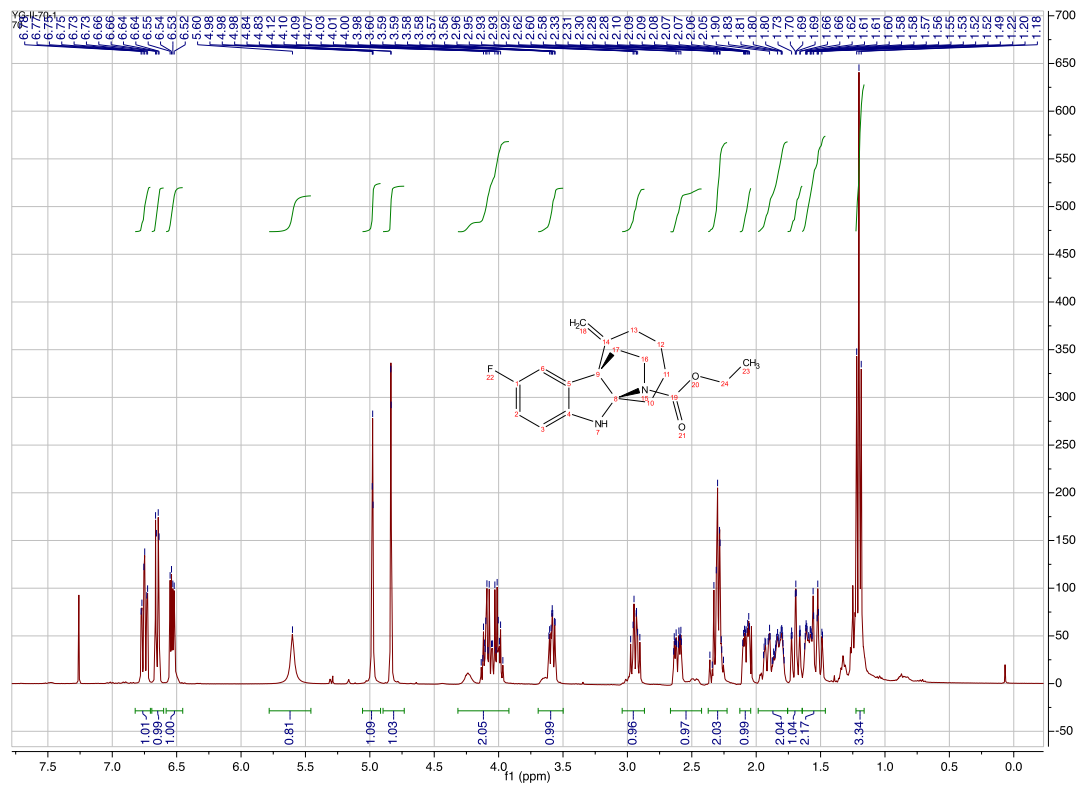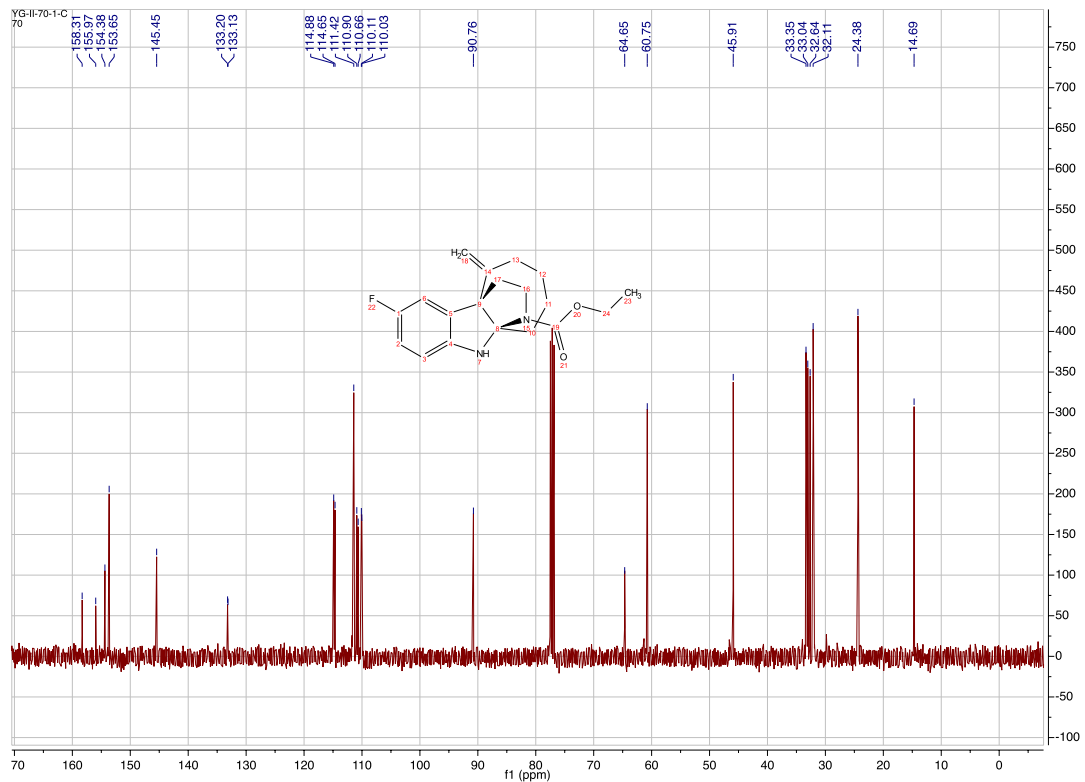

Compound 11g

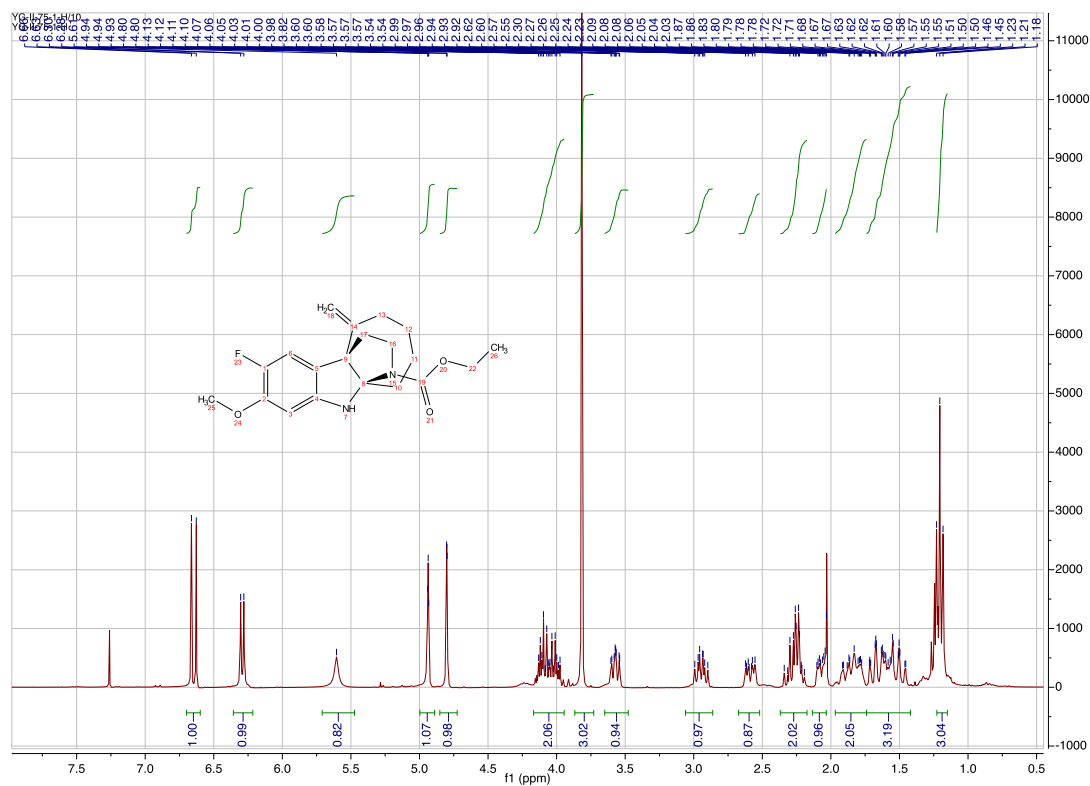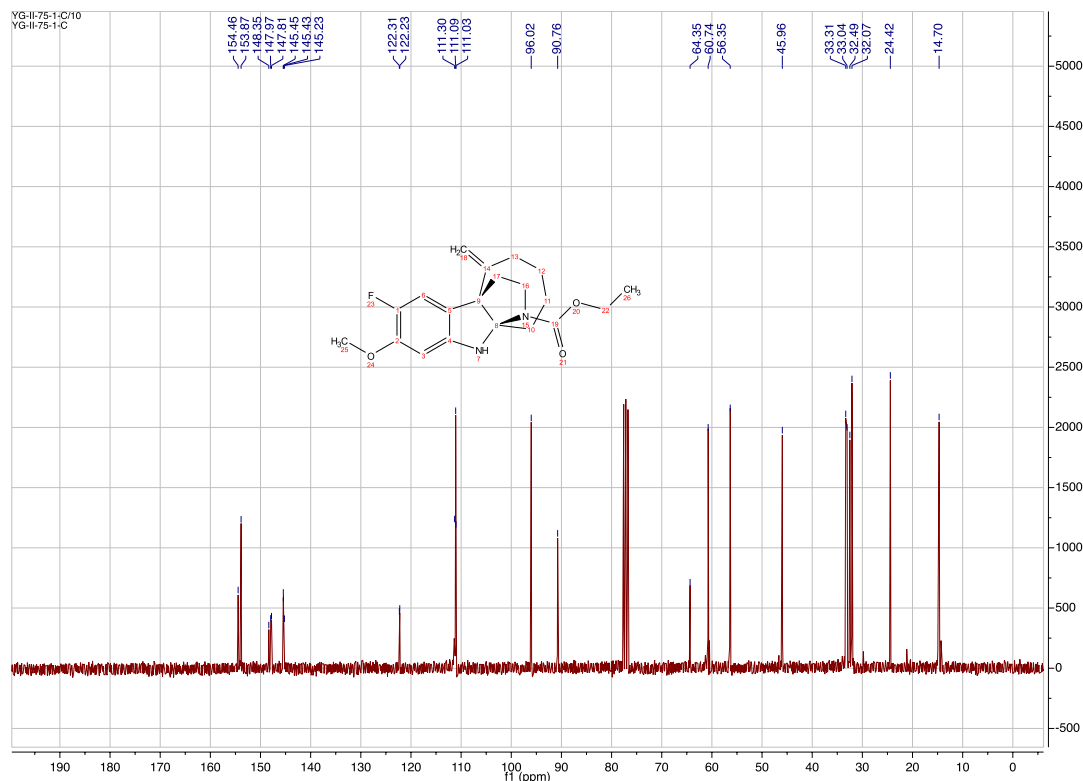

# Compound 12a

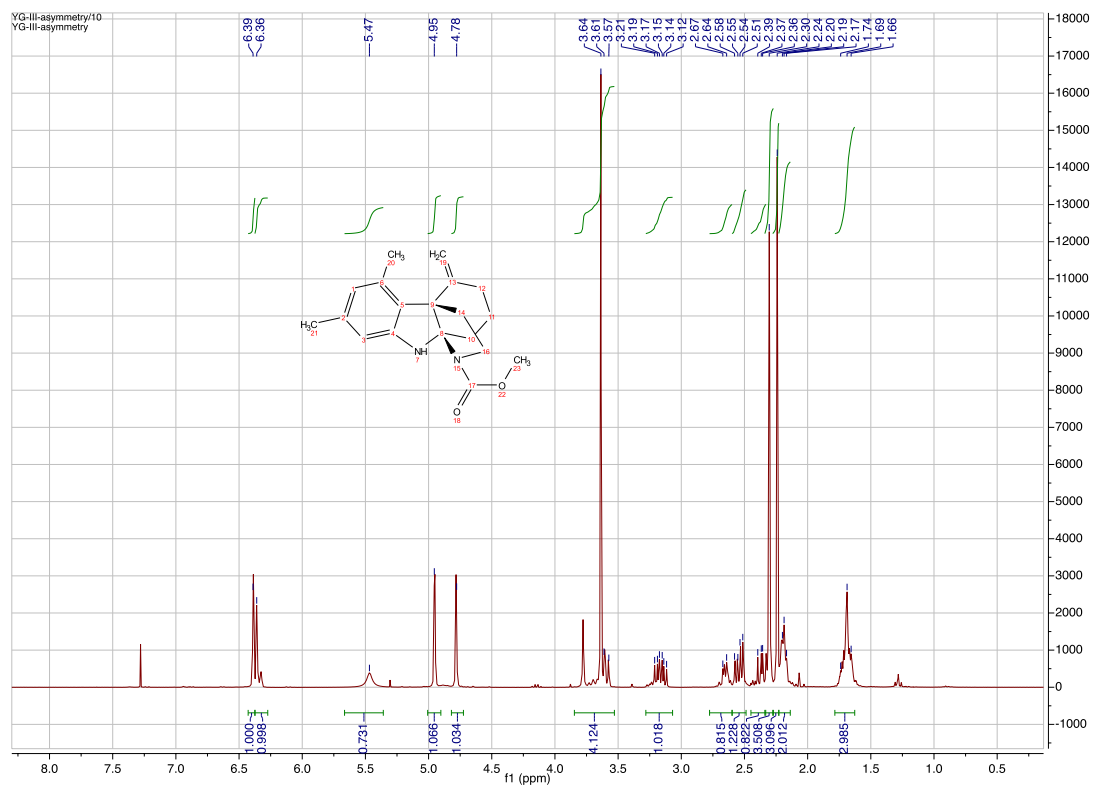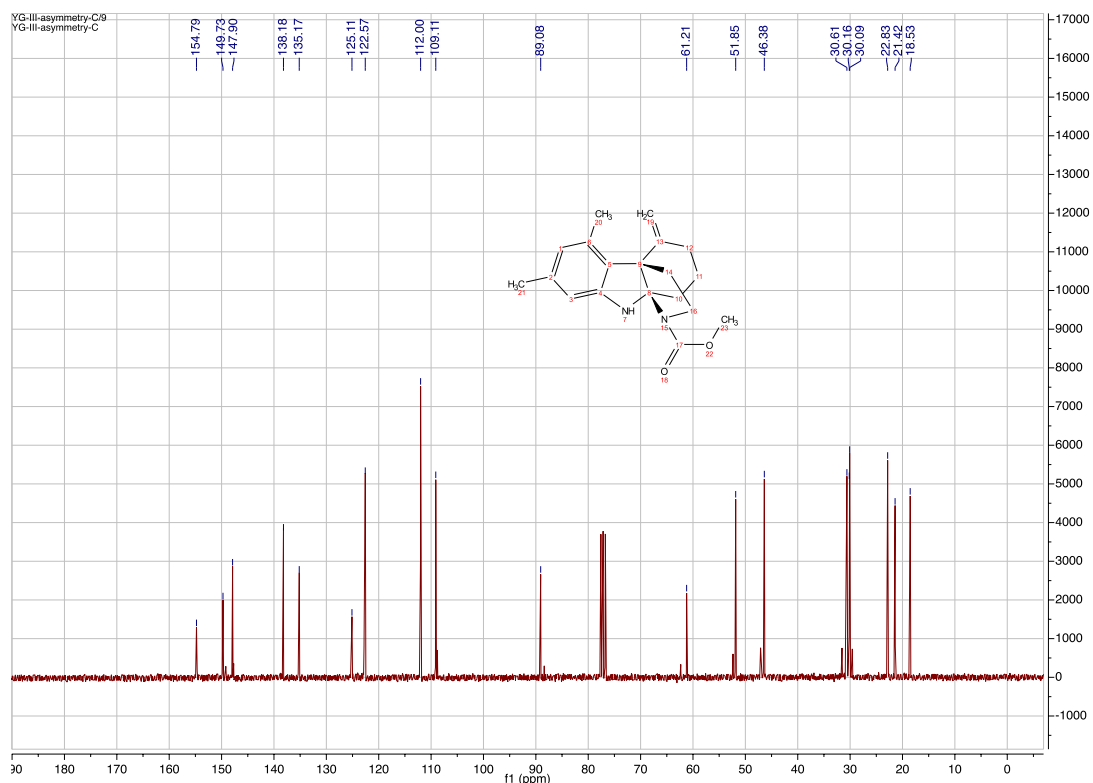

# Compound 12b

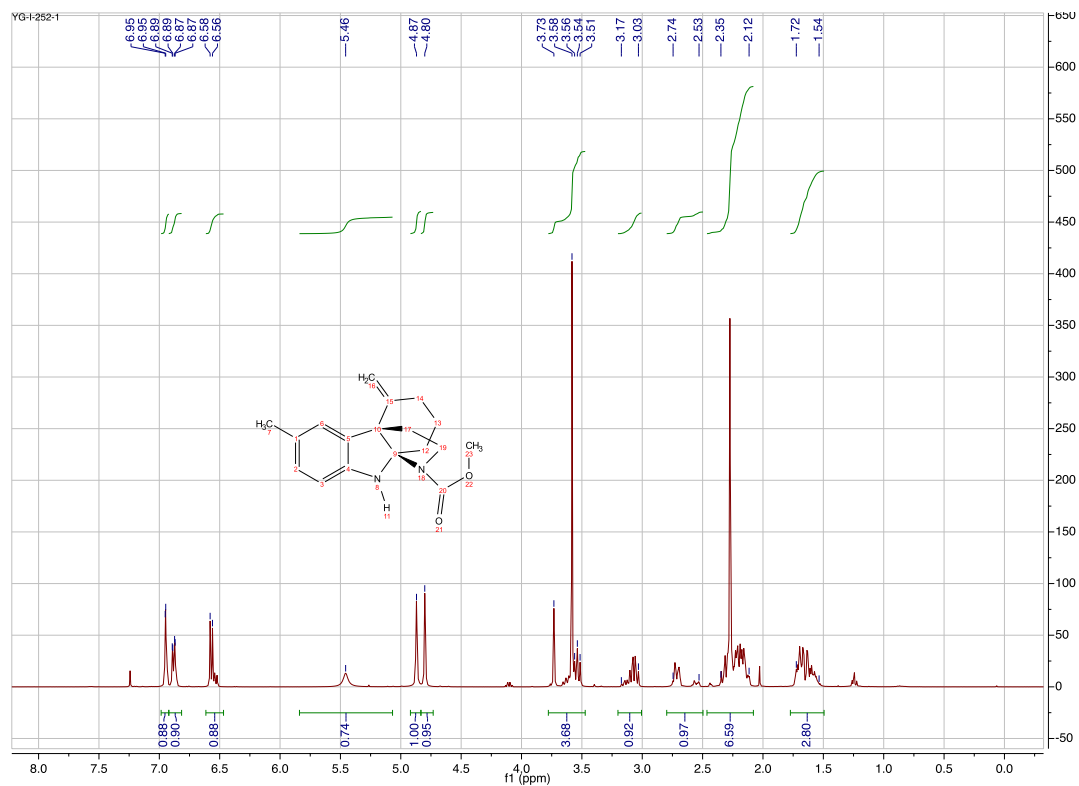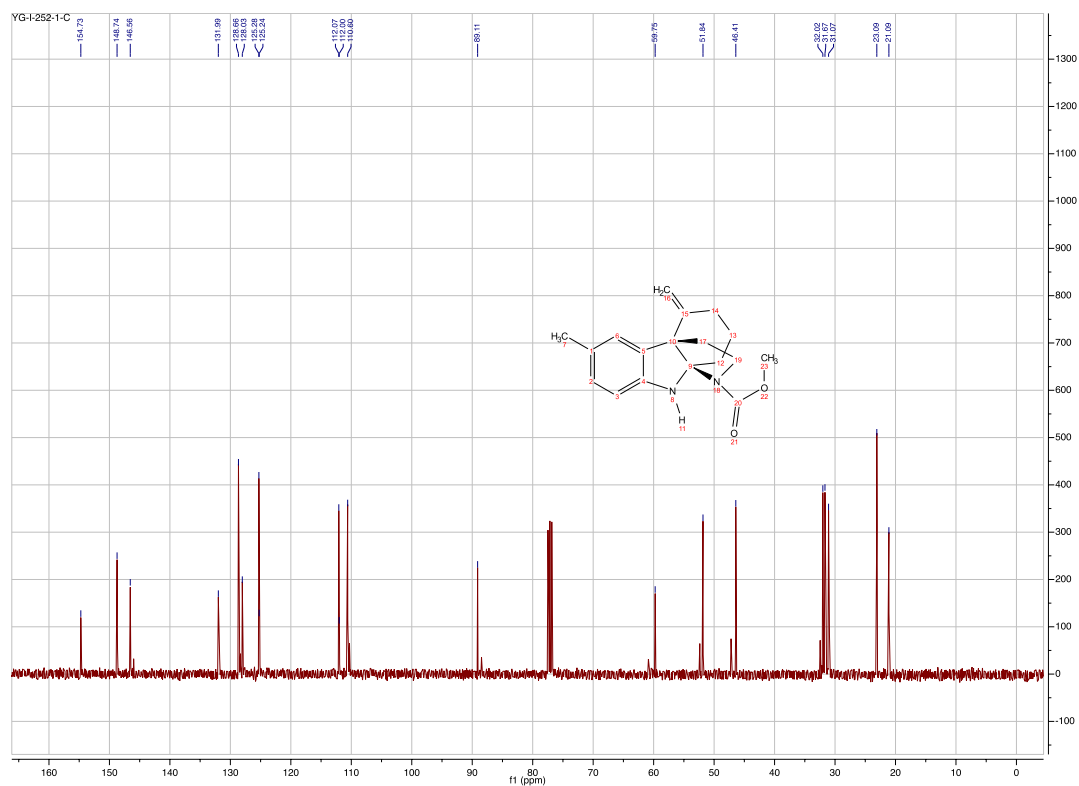



# Compound 12c

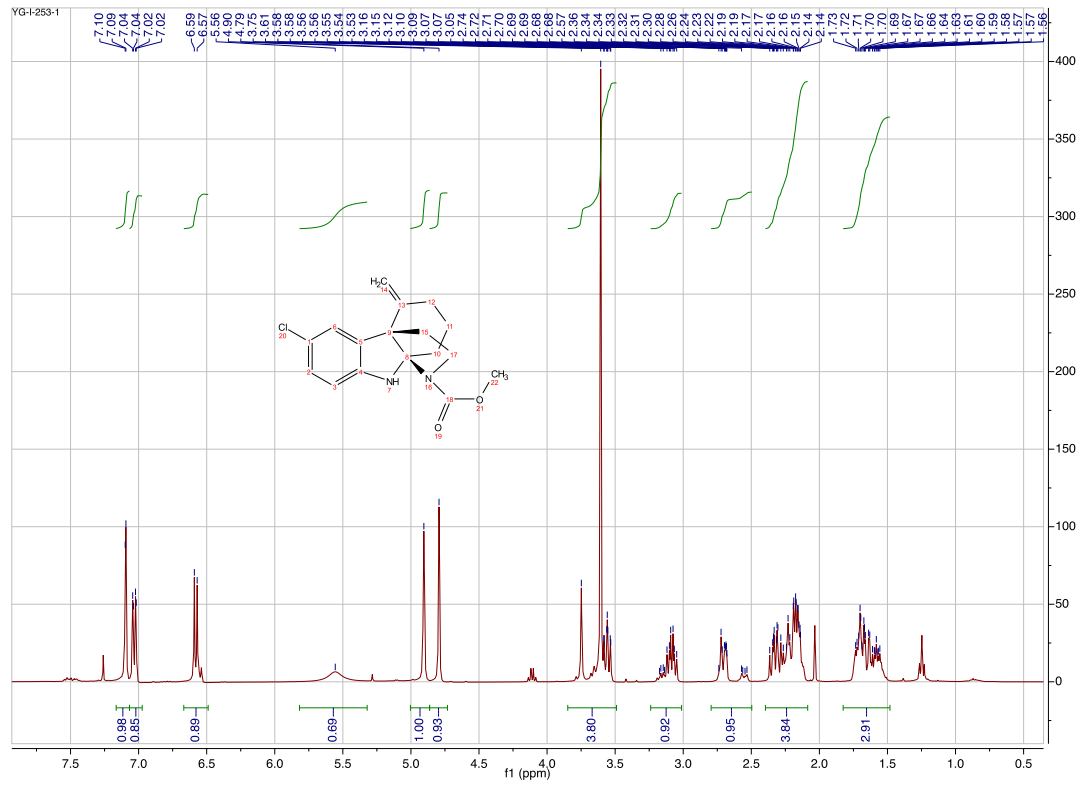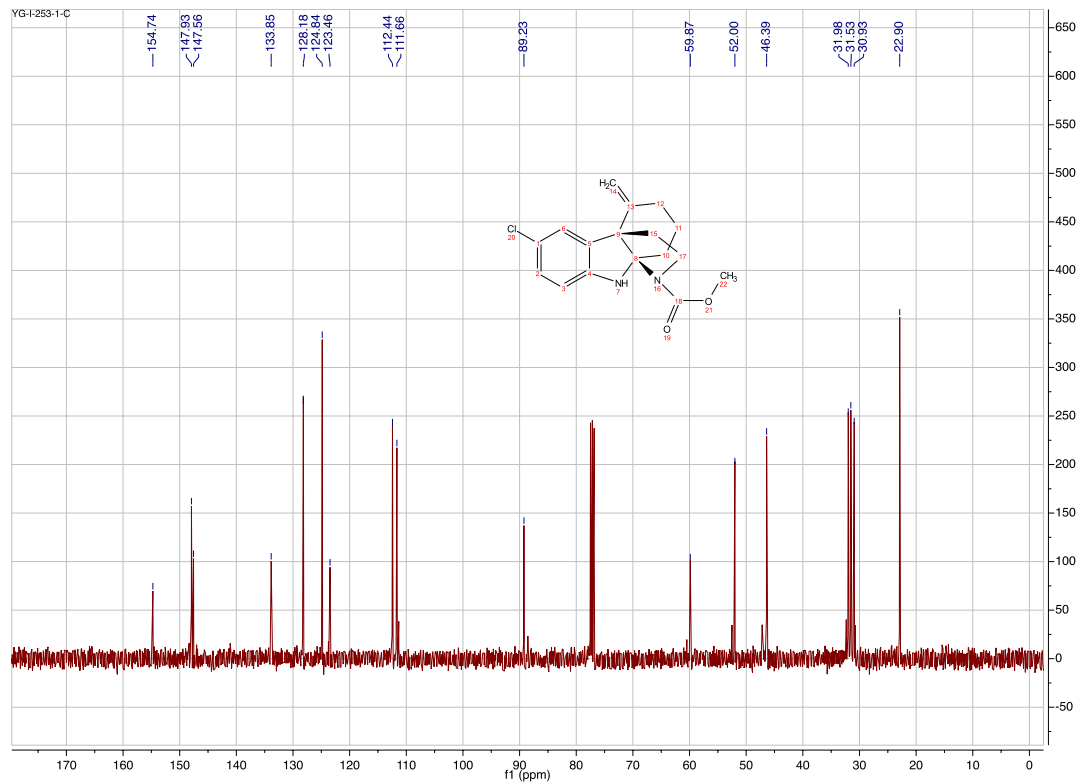

# Compound 12e

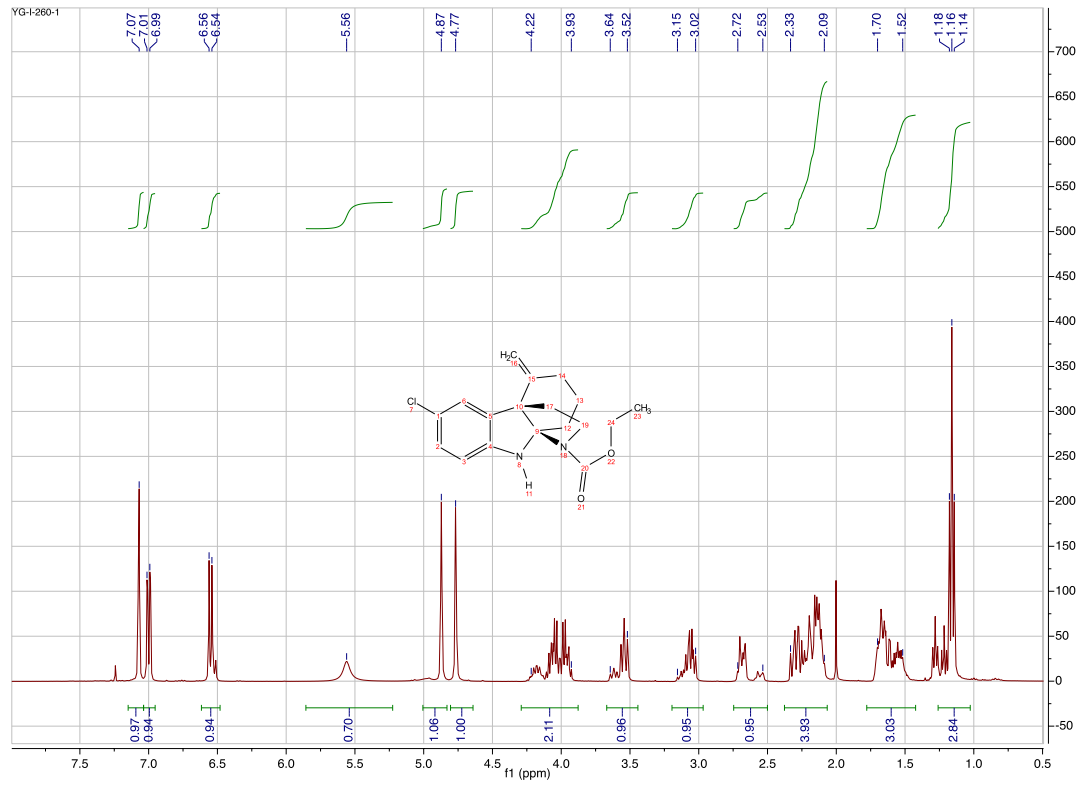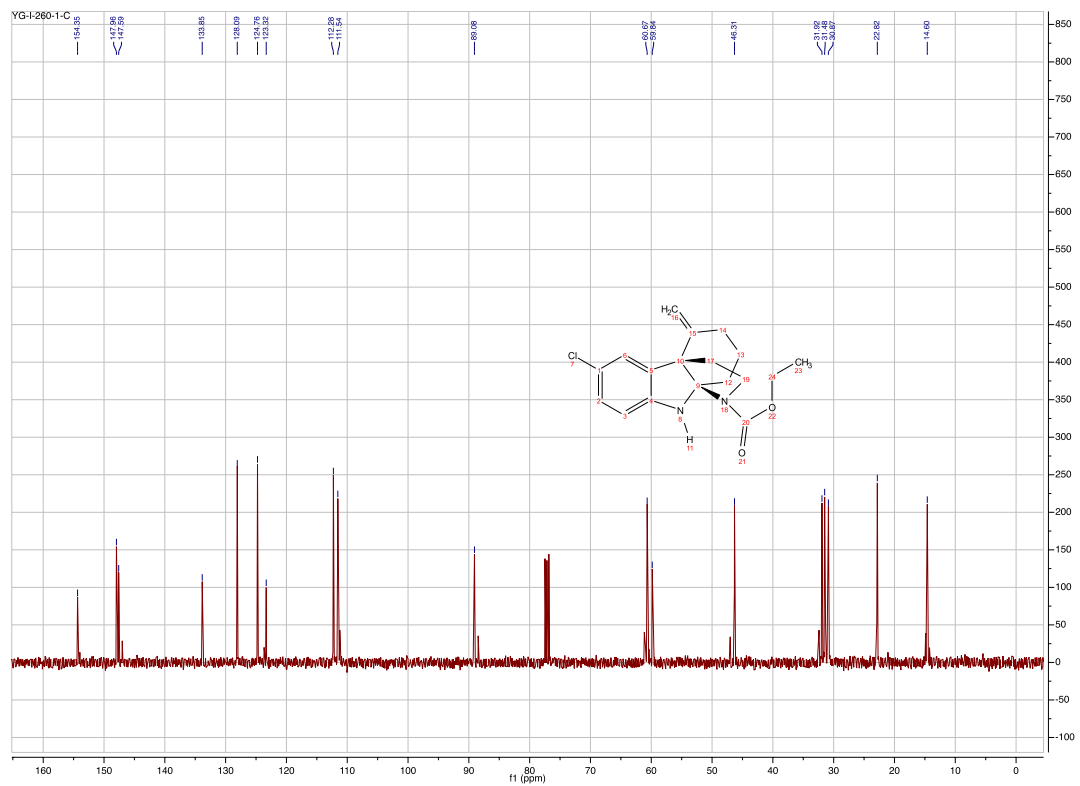

Compound 13a

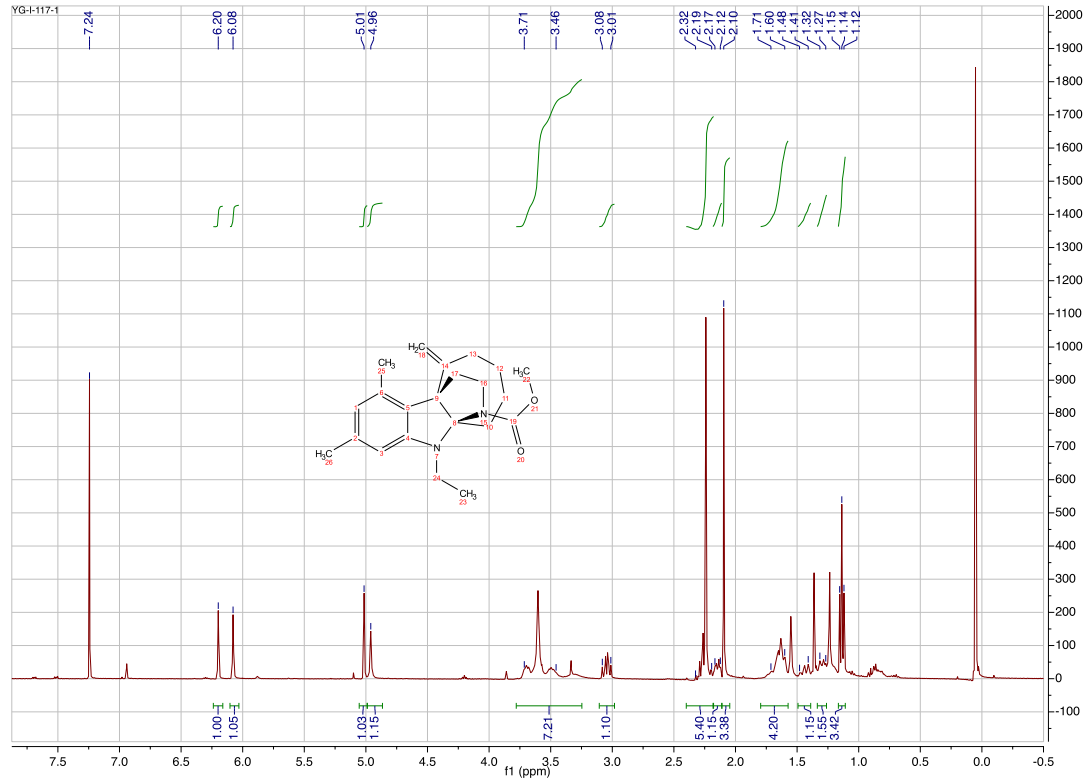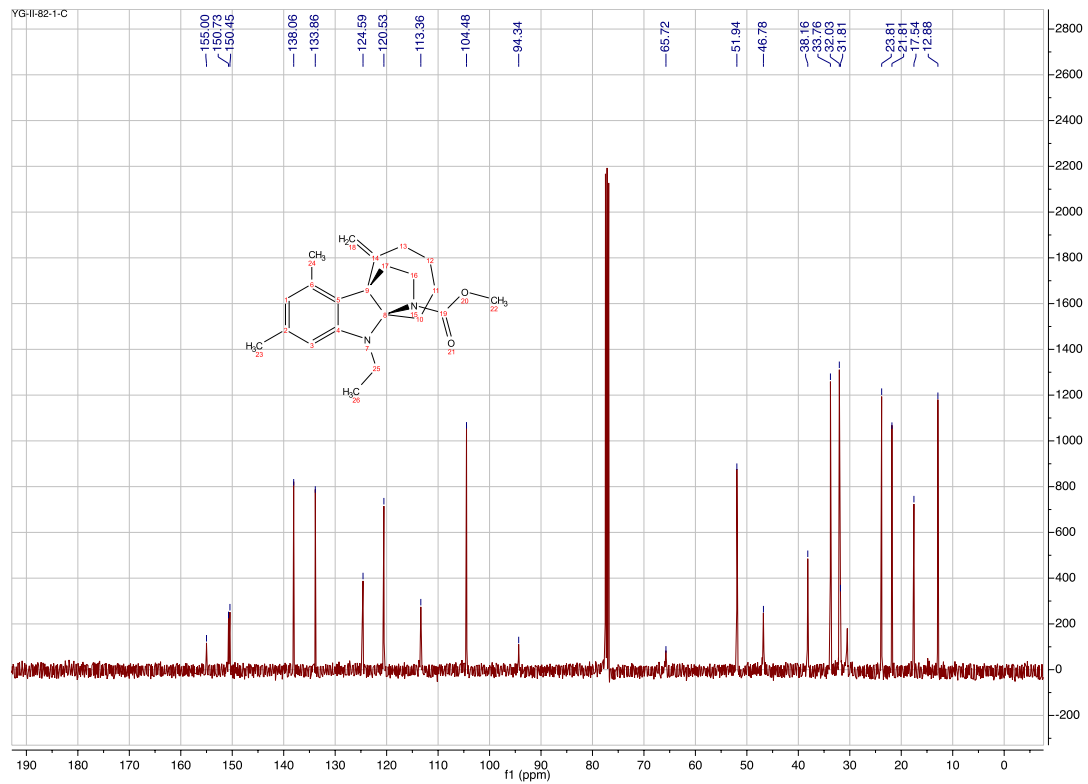

Compound 13c

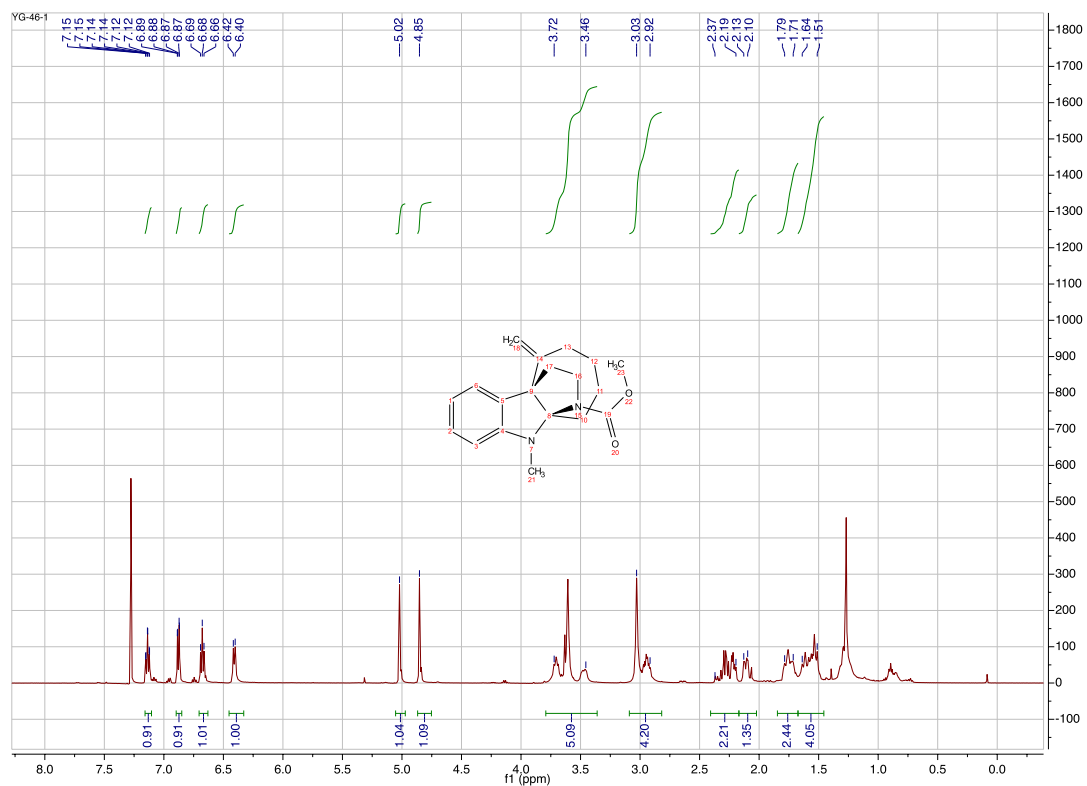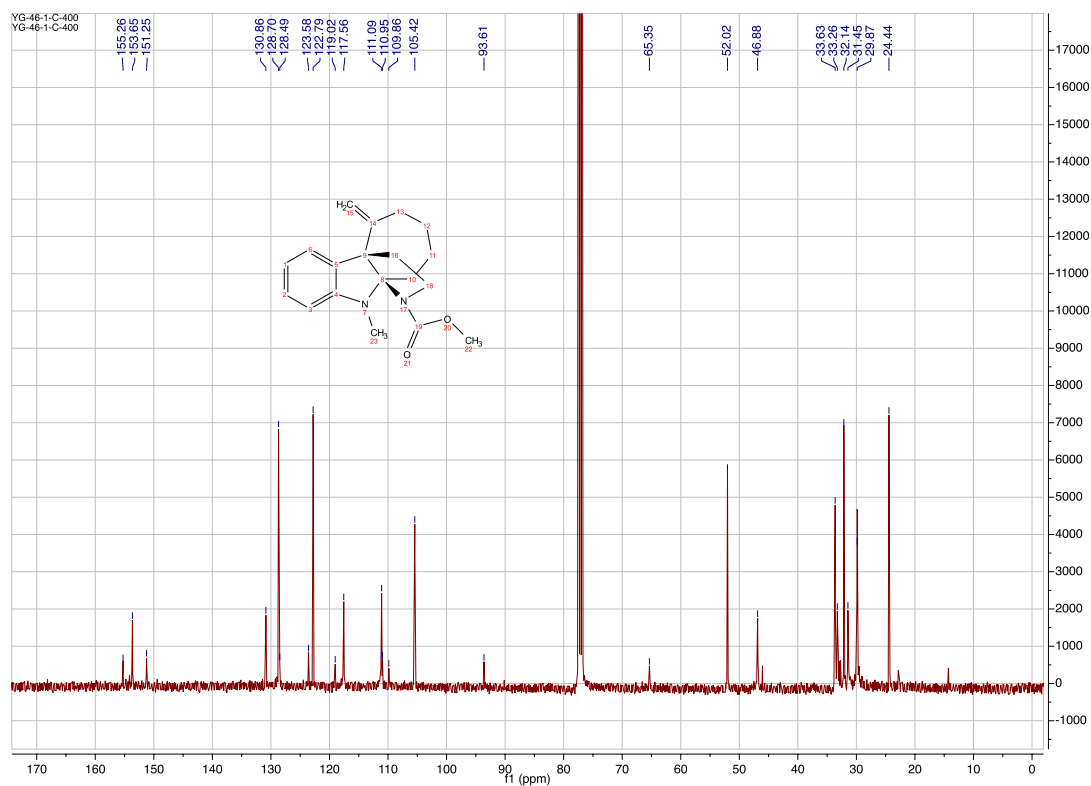

Compound 13d

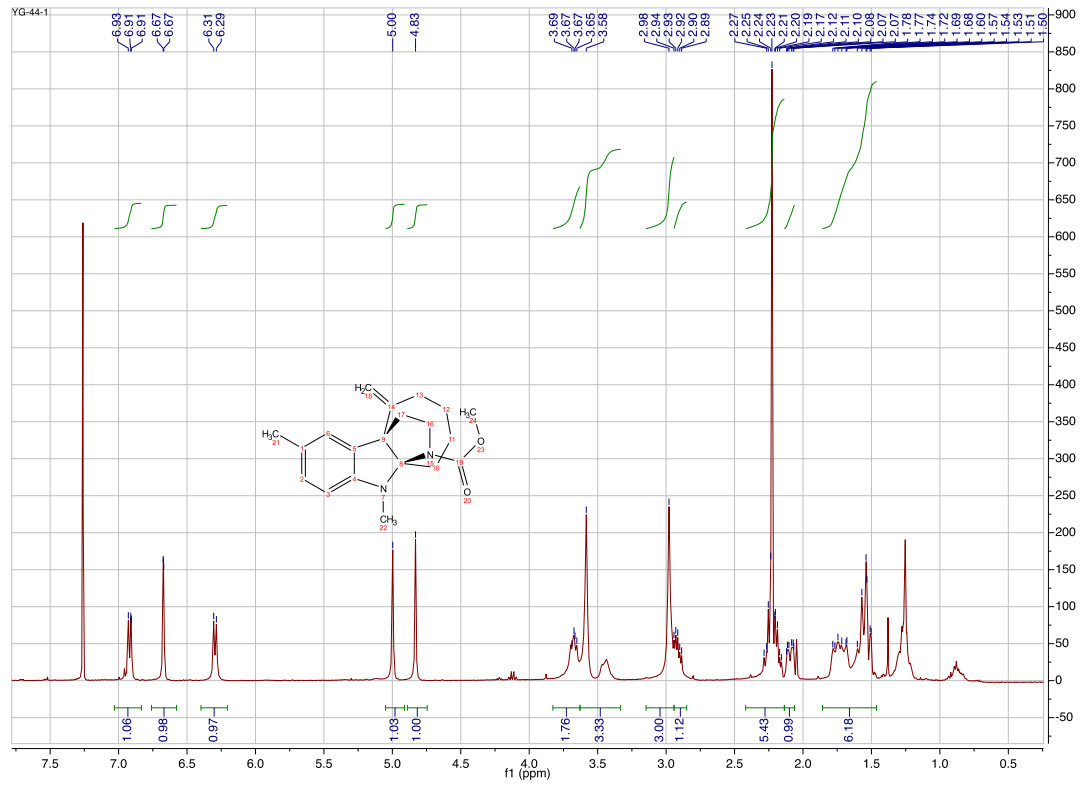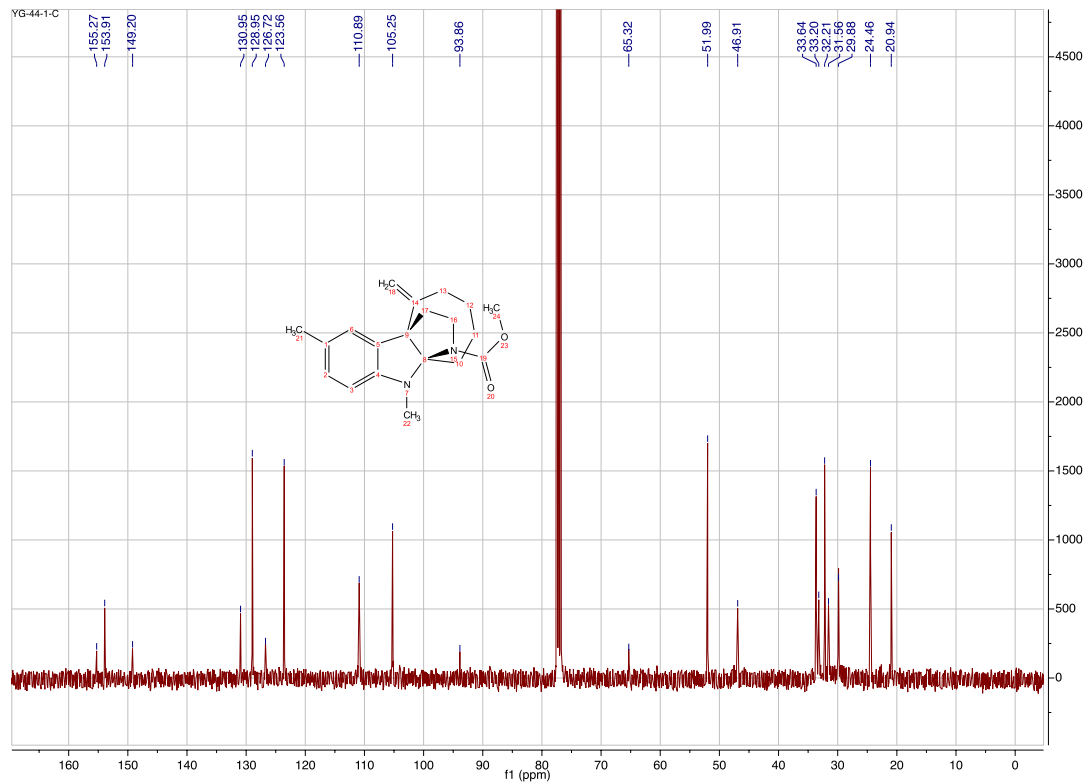

Compound 13e

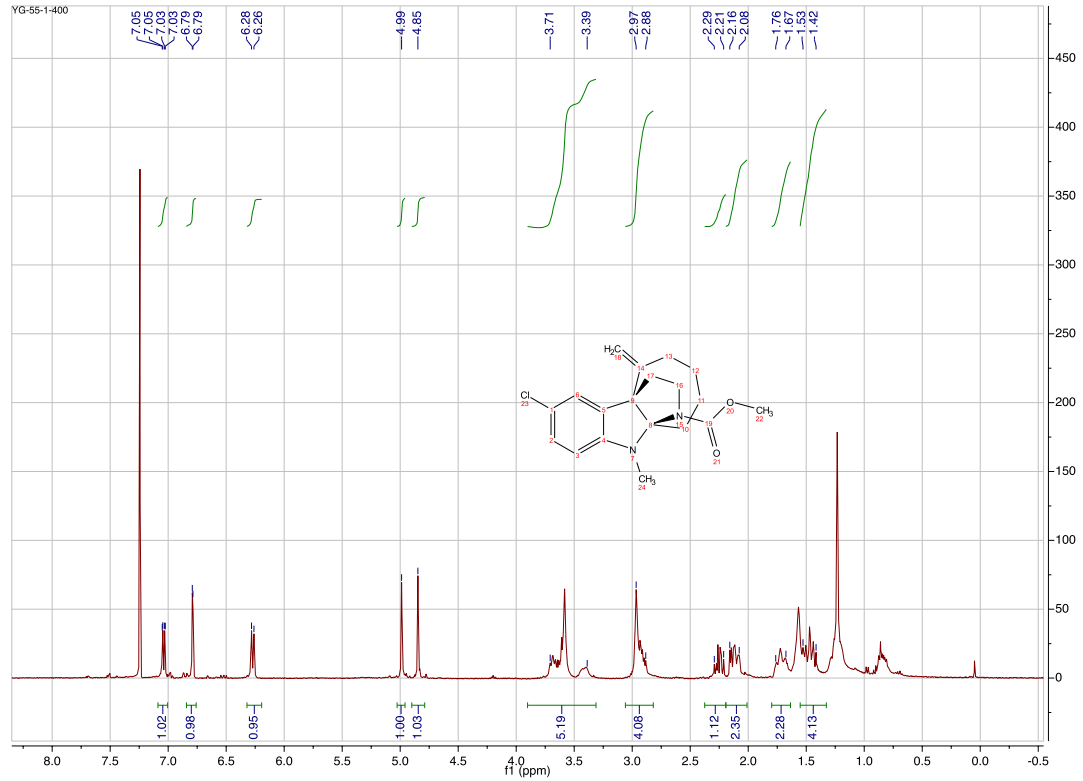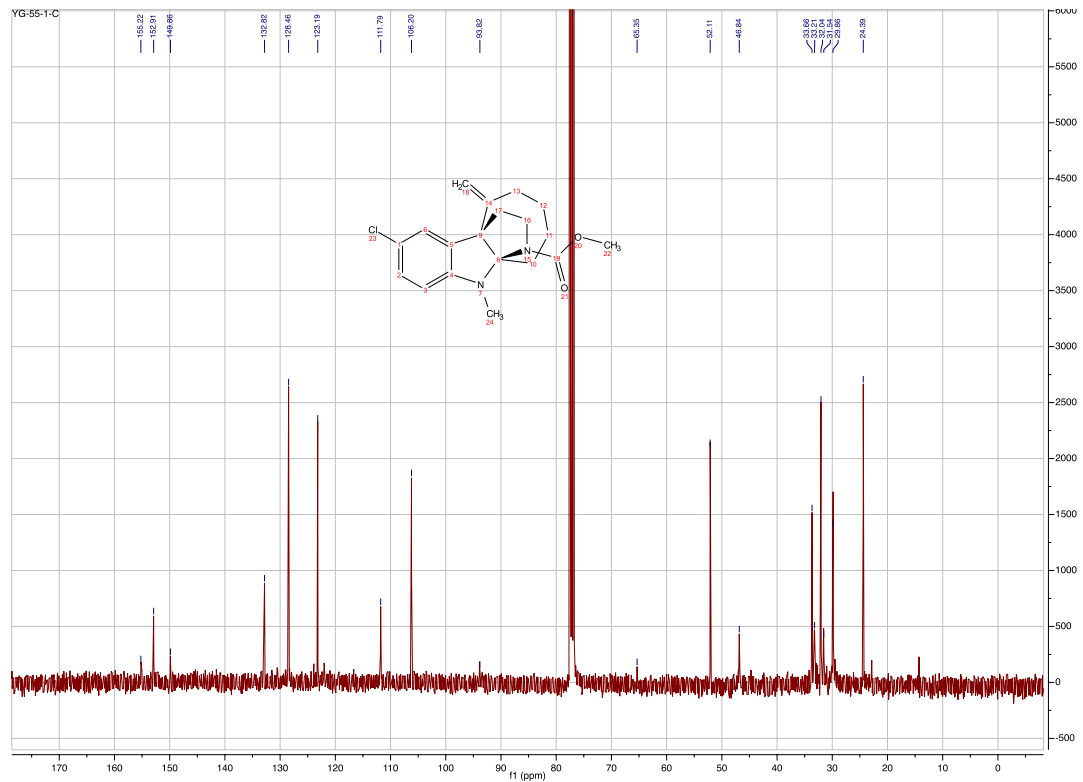

# Compound 14a

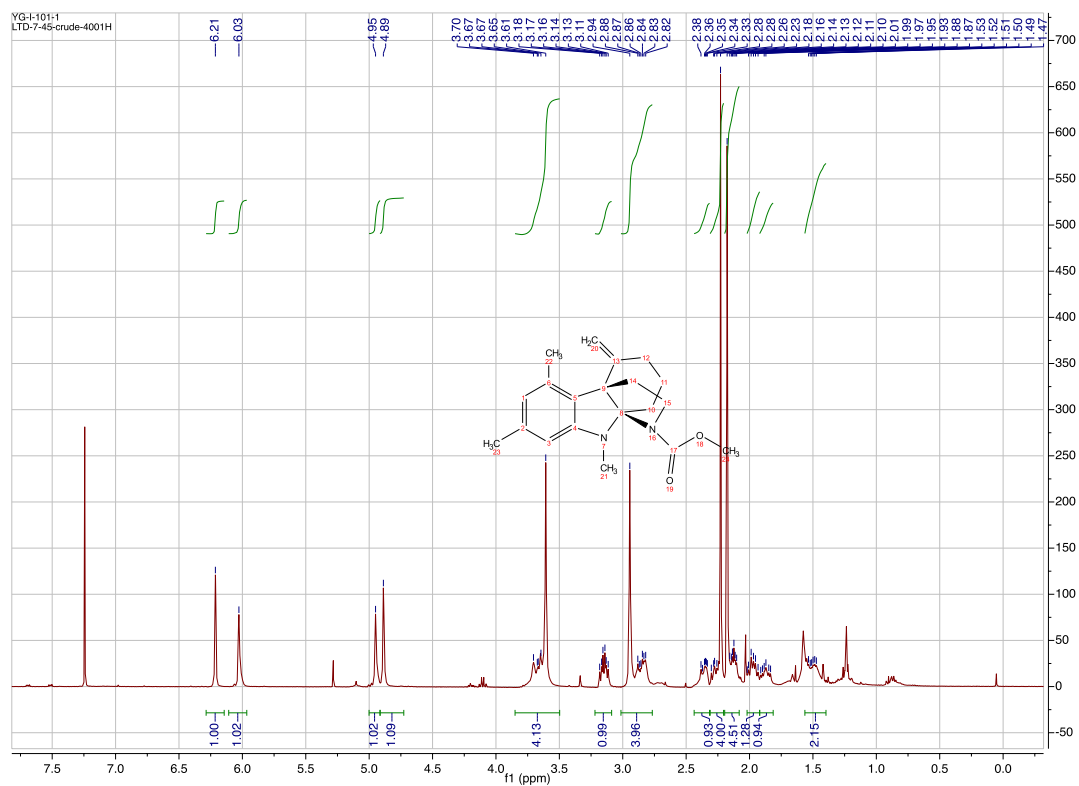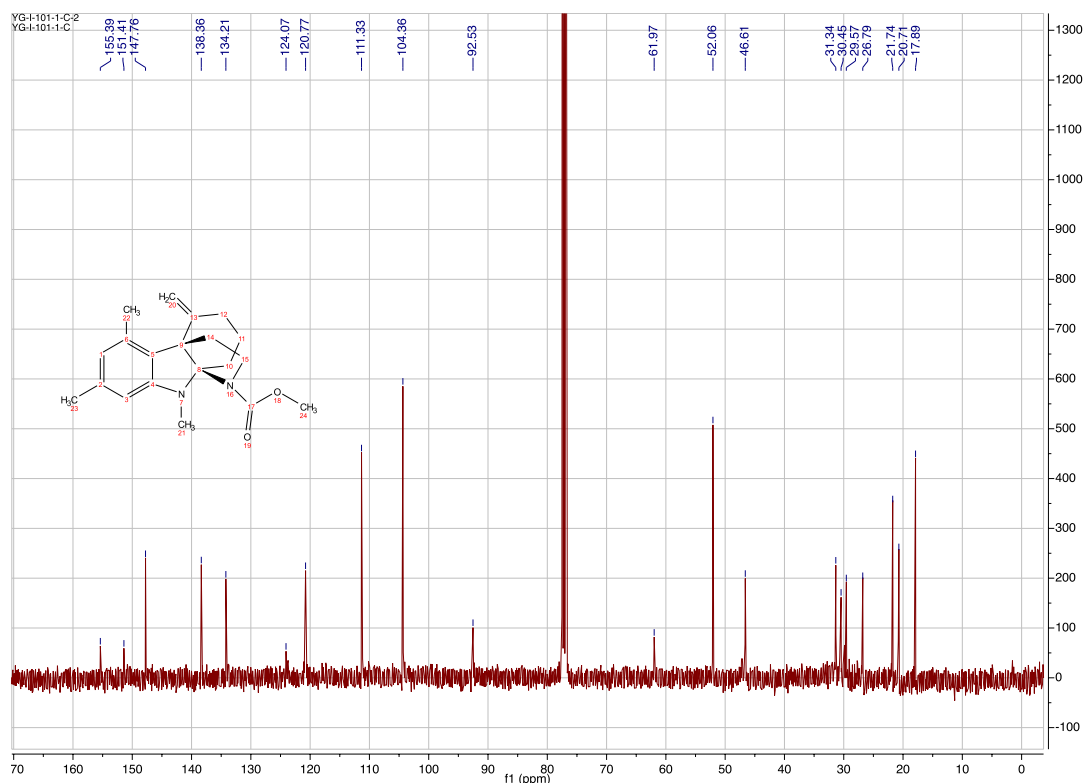

# Compound 14b

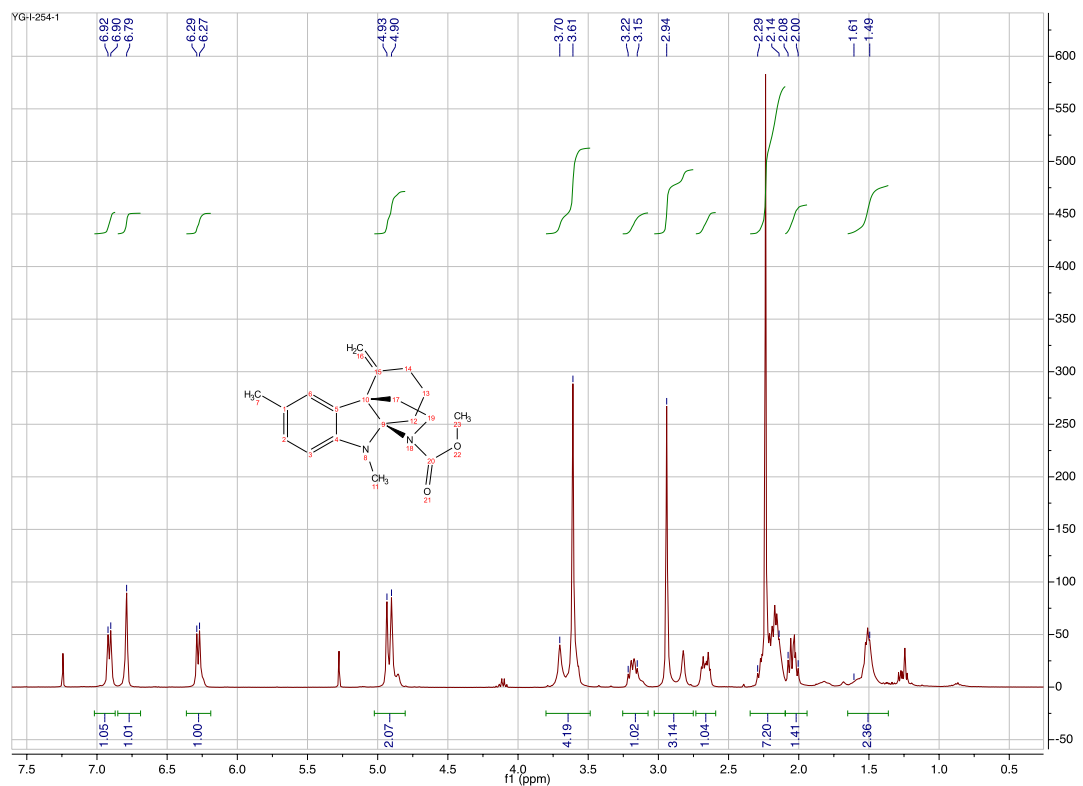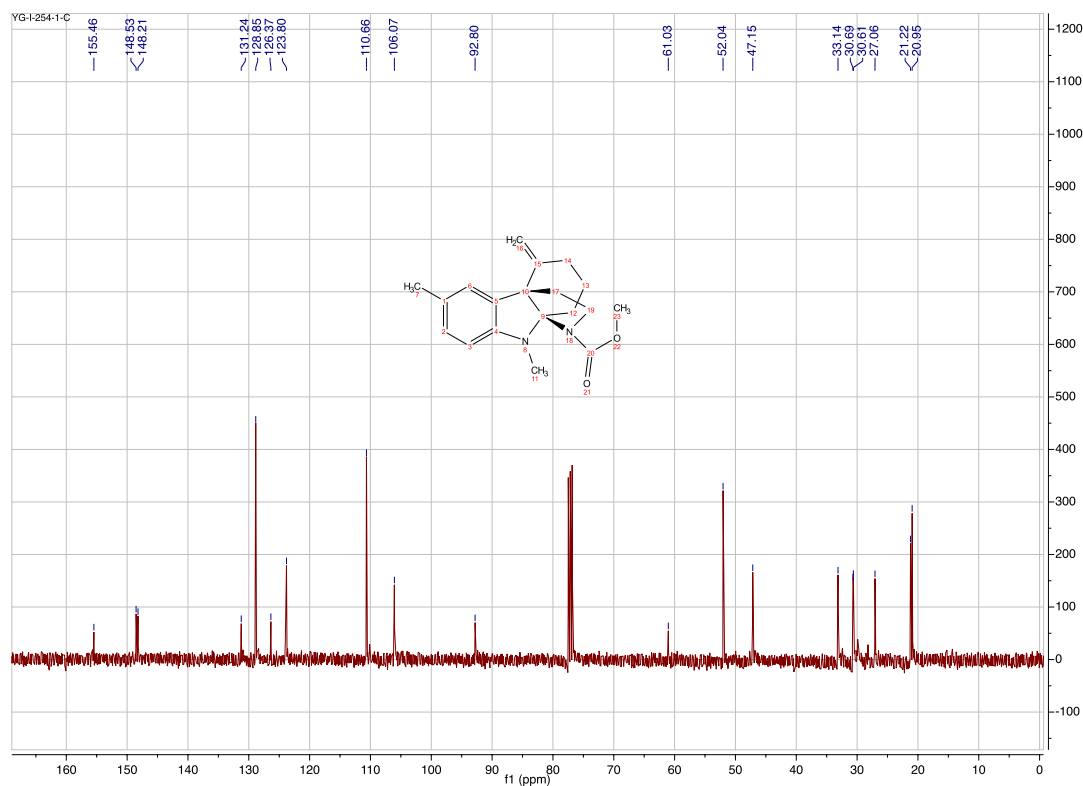



Compound 14d

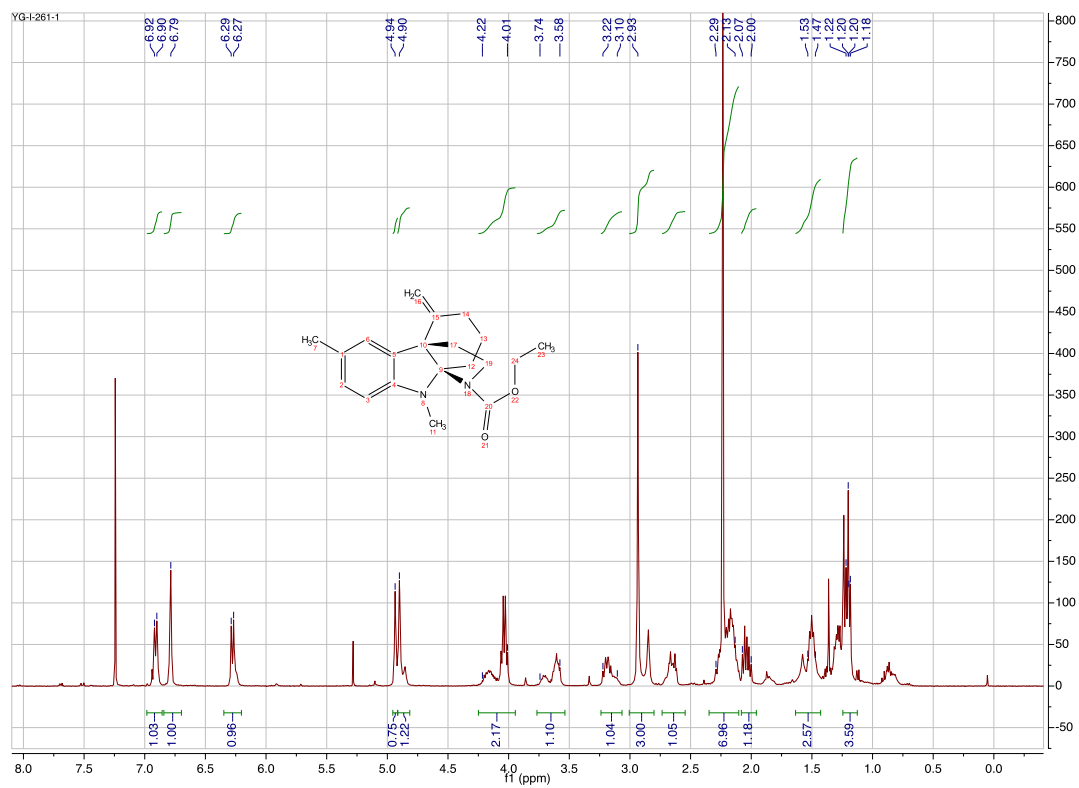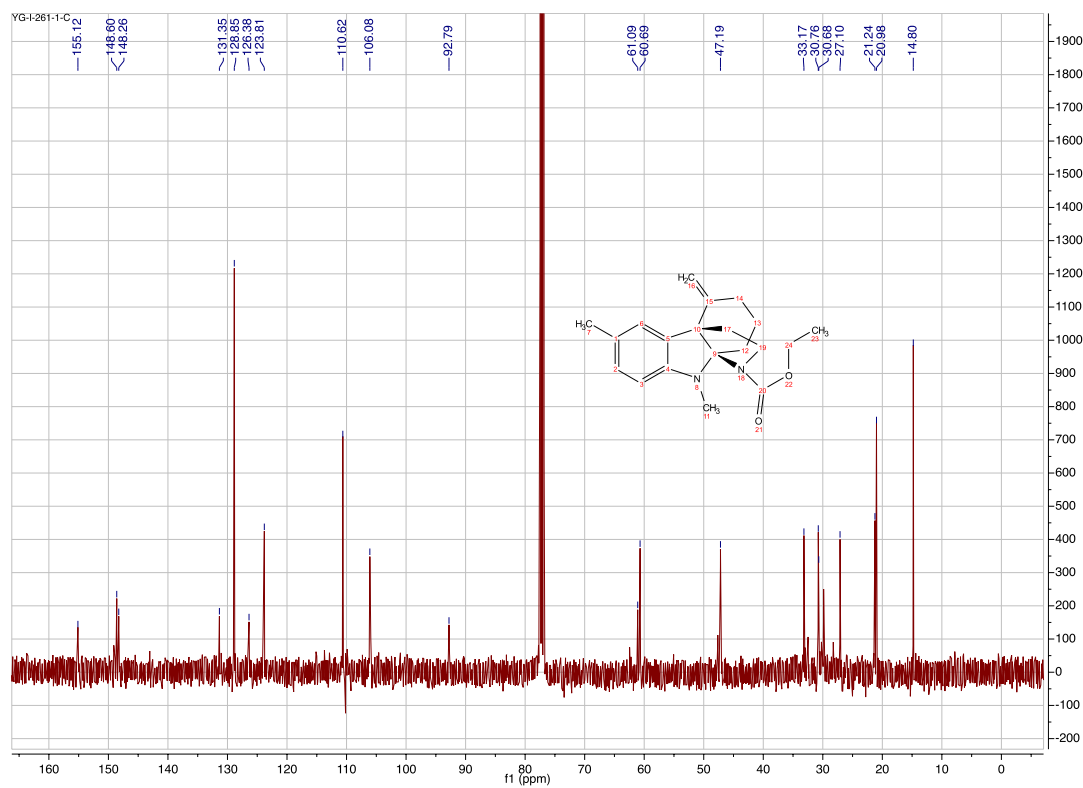

Compound **14e**

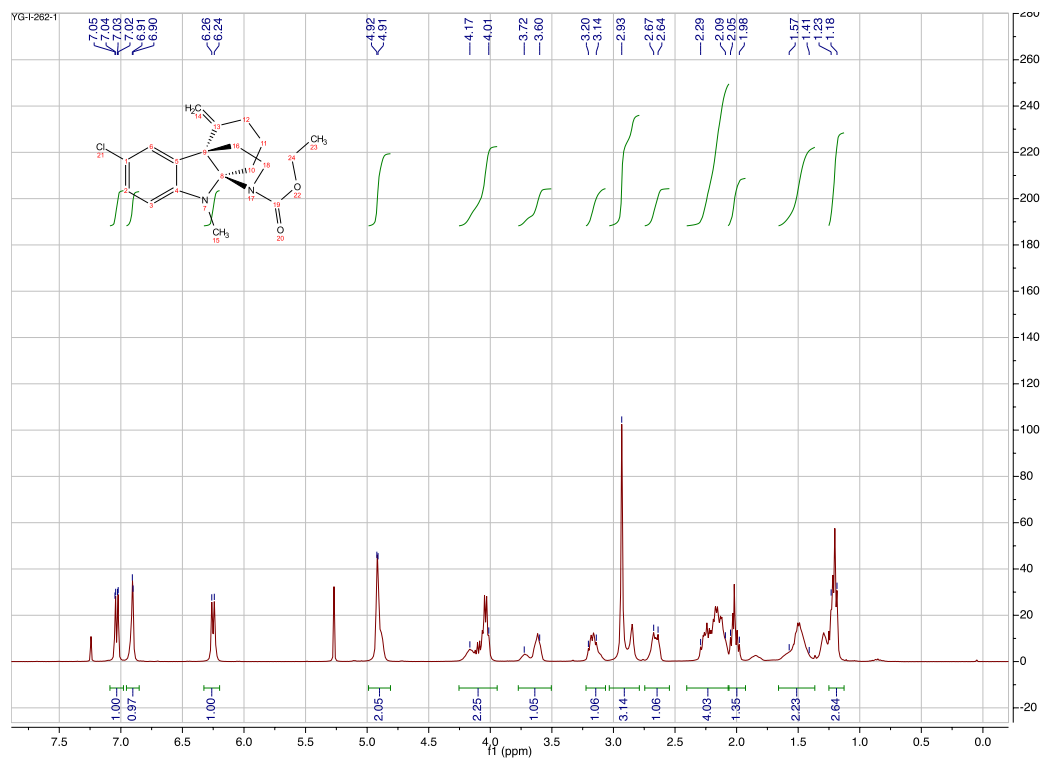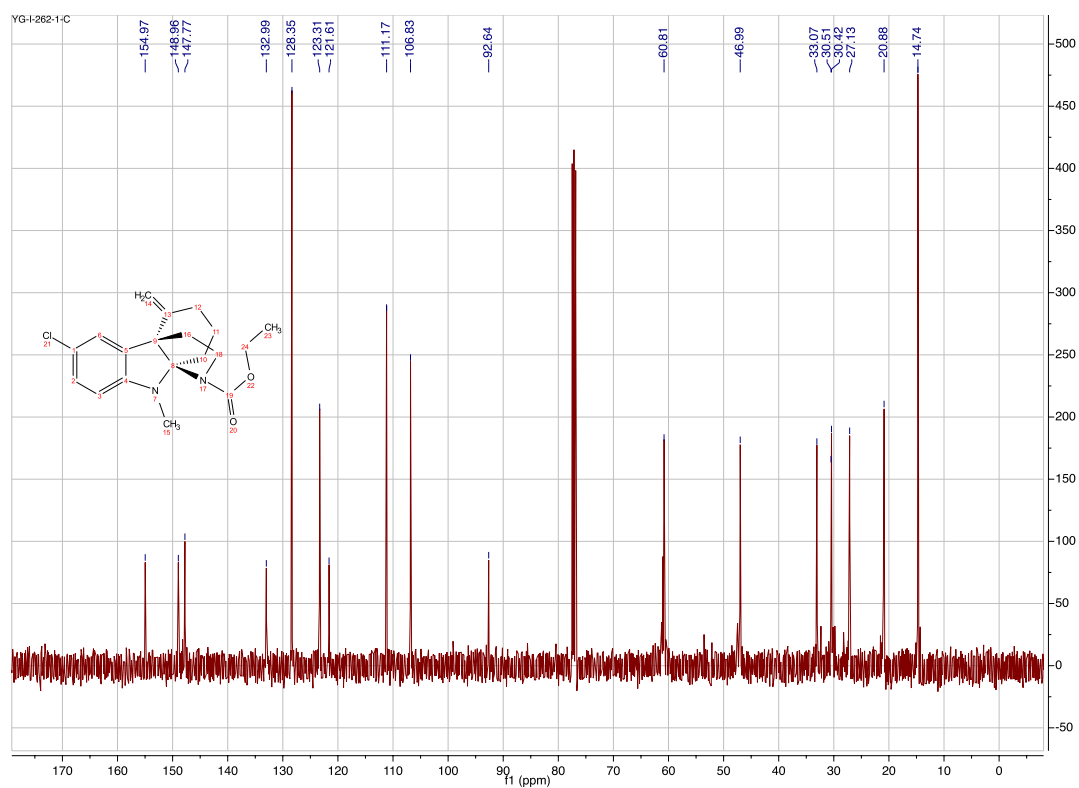

Supplement: NIHMS817975-supplement.pdf [file NIHMS817975-supplement.pdf]
